# Supplementary material for: Health status risk factors and quality of life in 75–84-year-old individuals assessed for dementia using the short 10/66 dementia diagnostic schedule
Source: PeerJ. 2021 Aug 19;9:e12040. doi: 10.7717/peerj.12040 (PMC8380427; doi:10.7717/peerj.12040)
Supplement: Supplemental Information 3 — Individuals that were considered to have dementia and those that did not are indicated. These groups were used for statistical analysis. [file peerj-09-12040-s003.xlsx]

## Sheet: Dataset 2021_09_15
EDNumber	BuildingNumber	Gender	Age	Agebracket	Education	Ethnicity	Religion	Marrital	Occupation	Occupationtype	Accommotype	Accommotenure	Socialnetwork	Socialnetwork_Other	Socialservices1	Socialservices2	Socialservices3	Socialservices4	Socialservices5	Socialservices6	Socialservices7	Medconditions1	Medconditions2	Medconditions3	Medconditions4	Medconditions5	Medconditions6	Medconditions7	Medconditions8	Medconditions9	Medconditions10	Medconditions11	Medconditions12	Medconditions13	Medconditions14	Medconditions15	Medconditions16	Medconditions17	Medications1	Medications2	Medications3	Medications4	Medications5	Medications6	Medications7	Medications8	Medications9	Medications10	Medications_Other
29400	043	1	75	2	1	10	1	5	0	7	0	1	5	Brother and nephew	1	0	0	0	0	0	0	0	0	0	0	0	0	0	1	0	0	0	0	1	0	0	0	0	0	1	0	1	1	0	0	0	0	0	88
24602	012	1	75	2	1	4	4	3	0	8	0	1	3	88	1	0	1	0	0	0	0	0	0	0	0	0	0	0	1	0	0	0	0	1	0	0	0	0	0	1	1	1	1	1	0	1	1	0	88
2300	050	1	75	2	1	4	4	3	0	99	0	2	5	Spouse and mother	1	0	0	0	0	0	0	0	0	1	0	0	0	0	0	0	0	0	0	1	0	0	0	0	0	1	0	0	0	0	0	0	1	0	88
25400	134	2	75	3	1	7	1	3	0	99	0	1	2	88	0	0	0	0	0	0	0	0	0	0	0	0	0	0	1	0	0	0	0	1	0	0	0	0	0	1	1	0	1	0	0	0	0	0	88
12500	125	1	75	2	1	1	1	3	9	9	0	1	3	88	0	0	0	0	0	0	0	0	0	0	0	0	0	0	0	0	0	0	0	0	0	0	0	1	0	0	0	0	0	0	0	0	0	0	88
3602	010	1	75	2	3	4	4	3	0	7	0	2	2	88	1	0	0	0	0	0	0	0	0	1	0	1	0	0	0	0	0	0	0	1	0	0	0	0	0	1	0	0	0	0	1	0	0	0	88
3602	025	1	75	2	3	4	4	3	0	7	0	2	2	88	1	0	0	0	0	0	0	0	0	1	0	1	0	0	0	0	0	0	0	0	0	0	0	0	0	0	0	0	0	0	1	0	0	0	88
12500	130	2	75	2	1	4	4	5	0	5	0	1	4	88	0	0	0	0	0	0	0	0	0	1	0	0	0	0	0	0	0	0	0	0	0	0	0	0	0	0	0	0	0	0	1	0	0	0	88
27300	017	1	75	2	1	4	4	3	9	8	0	1	3	88	1	0	0	0	0	0	0	0	0	0	0	0	0	0	1	0	0	0	1	1	0	0	1	0	0	1	0	0	1	0	0	1	0	0	88
2400	130	2	75	2	1	4	4	5	0	5	0	4	5	Children and grandchildren	1	0	0	0	0	0	0	0	0	1	0	1	0	0	1	0	0	0	0	0	0	0	0	0	0	1	1	0	1	0	1	0	1	1	Cancer medication
18300	064	2	75	2	2	7	10	4	0	1	0	2	1	88	1	0	1	0	0	0	0	0	0	0	0	0	0	0	1	0	0	0	0	1	0	0	0	0	0	1	0	0	1	1	0	0	0	0	88
4301	155	2	75	2	1	4	6	3	0	5	0	2	2	88	1	0	1	0	0	0	0	0	0	0	0	0	0	0	0	0	0	0	1	1	0	0	1	0	0	0	0	0	0	0	0	1	0	1	Hernia
13200	121	1	75	2	1	7	13	4	0	99	0	1	1	88	0	0	0	0	0	0	0	0	0	0	0	0	0	0	1	0	0	0	0	1	0	0	1	0	0	1	0	0	1	1	0	0	0	0	88
13100	055	1	75	2	1	4	1	1	0	2	0	4	2	88	0	0	1	0	0	0	0	0	0	0	0	0	0	0	1	0	0	0	1	1	0	0	0	0	0	1	0	0	1	1	0	0	0	0	88
5800	192	1	75	2	1	7	13	3	0	9	0	2	5	Children grandchildren and spouse	0	0	0	0	0	0	0	0	0	0	0	0	0	0	0	0	0	0	0	0	0	0	0	1	0	0	0	0	0	0	0	0	0	0	88
13100	037	2	75	2	3	7	13	2	0	7	0	4	1	88	0	0	1	0	0	0	1	0	0	1	0	0	0	0	0	0	0	0	1	1	0	0	0	0	0	1	0	0	0	0	0	1	0	0	88
29400	016	2	75	2	1	5	10	3	0	5	0	2	3	88	1	0	0	0	0	1	0	0	0	1	0	0	0	0	1	0	0	0	0	1	0	0	1	0	0	1	0	0	1	0	1	0	0	1	Thyroid medication
18000	088	2	75	2	4	1	3	3	0	5	0	2	3	88	0	0	0	0	0	0	0	0	0	1	0	0	0	0	0	0	0	0	0	1	0	0	0	0	0	1	0	0	0	0	1	0	0	0	88
33602	174	1	75	2	1	4	4	3	0	10	0	2	3	88	0	0	0	0	0	0	1	0	0	0	0	0	0	0	0	0	0	0	0	0	0	0	0	0	0	0	0	0	0	0	0	0	0	0	88
16100	095	2	75	2	9	4	10	5	0	5	0	2	4	88	1	0	0	0	0	0	0	0	0	1	0	0	0	0	1	0	0	0	0	1	0	0	0	0	0	1	0	0	1	0	1	0	0	0	88
8600	159	2	75	2	9	3	17	5	0	5	0	1	4	88	0	0	0	0	0	0	0	0	0	1	0	0	0	0	0	0	0	0	0	0	0	0	0	0	0	0	0	0	0	0	1	0	0	0	88
1000	059	2	75	2	2	1	2	5	0	2	0	2	1	88	1	0	0	0	0	0	0	0	0	0	0	0	0	0	0	0	0	0	0	1	0	0	0	0	0	1	0	0	0	0	0	0	0	0	88
12500	034	1	75	2	1	4	4	3	0	8	0	1	2	88	0	0	0	0	0	0	0	0	0	0	0	0	0	0	0	0	0	0	0	0	0	0	0	1	0	0	0	0	0	0	1	0	0	0	88
9700	002	1	75	2	1	1	10	5	0	2	0	2	1	88	1	0	0	0	0	0	0	0	0	0	0	0	0	0	1	0	0	0	0	1	0	0	0	0	0	1	0	0	1	0	0	0	0	0	88
9700	041	1	75	2	1	4	5	3	0	2	0	2	2	88	1	0	0	0	0	0	0	0	0	0	0	0	0	0	0	0	0	0	0	0	0	0	0	1	0	0	0	0	0	0	0	0	0	0	88
9700	056	1	75	2	1	4	4	3	0	2	0	2	2	88	1	0	0	0	0	0	0	0	0	0	1	0	0	0	0	0	0	0	0	1	0	0	0	0	0	0	0	0	1	0	0	0	0	1	Asthma medication
1900	131	1	75	2	1	1	13	5	0	2	0	2	4	88	0	0	0	0	0	0	0	0	0	0	0	0	0	0	0	0	0	0	1	0	0	0	1	0	0	0	0	0	0	0	0	1	0	1	Prostate medication
11300	022	2	75	2	1	1	13	4	0	10	0	1	4	88	1	0	0	0	0	0	0	0	0	1	0	0	0	0	0	0	0	0	0	0	0	0	1	0	0	0	0	0	0	0	0	0	0	0	88
9001	043	2	75	2	1	7	10	5	0	6	0	2	5	Grandchildren	0	0	0	0	0	0	0	0	0	0	0	0	0	0	0	0	0	0	0	0	0	0	0	0	0	0	0	1	0	0	0	0	0	1	Varicose veins
15400	006	2	75	2	4	4	13	5	0	9	0	2	4	88	0	0	0	0	0	0	1	0	0	0	0	0	0	0	1	0	0	0	0	1	0	0	0	0	0	1	0	0	1	0	0	0	1	0	88
31900	019	1	75	2	1	7	13	4	0	10	2	3	4	88	0	0	1	0	0	0	0	0	0	1	0	0	0	0	1	0	0	0	0	0	0	0	0	0	0	1	0	0	0	1	0	0	0	0	88
25900	113	2	75	2	2	7	13	4	0	8	0	6	5	Aunt	1	0	0	0	0	0	0	0	0	1	0	0	0	0	1	0	0	0	1	1	0	0	0	0	0	1	1	0	1	0	0	1	0	0	88
1800	014	1	75	2	1	1	17	3	0	9	0	2	2	88	1	0	1	0	0	0	1	1	0	1	0	0	0	1	0	0	1	0	0	0	0	0	0	0	0	0	0	0	0	0	1	0	1	0	88
4402	023	2	75	2	1	1	10	5	0	5	0	2	5	Grandchild	1	0	0	0	0	0	0	0	0	1	0	0	0	0	0	0	1	0	0	1	0	0	0	0	0	0	1	0	0	0	1	0	1	1	Swelling in feet
30502	009	1	75	2	1	7	1	4	0	9	0	2	1	88	0	0	1	0	0	0	0	0	0	1	0	0	0	0	0	0	0	0	0	1	0	0	0	0	0	1	0	0	0	0	1	0	0	0	88
26001	035	1	75	2	1	1	13	5	1	9	0	2	1	88	0	1	1	0	0	0	0	0	0	0	0	0	0	0	0	0	0	0	0	0	0	0	1	0	0	0	0	0	0	0	0	0	0	1	Kidney medication
4302	058	1	75	2	1	4	10	3	0	6	4	3	2	88	0	0	0	0	0	0	0	0	0	0	0	0	0	0	0	0	0	1	0	1	0	0	0	0	0	1	1	1	0	0	1	0	0	0	88
20400	088	2	75	2	1	5	1	3	0	8	0	2	2	88	1	0	1	1	0	0	1	0	0	1	0	0	0	0	1	0	0	0	0	1	0	0	1	0	0	1	0	0	1	0	1	0	0	0	88
20400	077	1	75	2	1	1	2	1	0	9	0	1	1	88	1	0	0	0	0	0	0	0	0	0	0	0	0	0	1	0	0	0	0	1	0	0	0	0	0	1	0	0	1	1	0	0	0	0	88
6000	027	2	75	2	3	4	4	1	0	7	0	2	5	Nephew and family	1	0	0	0	0	0	0	0	0	0	0	0	0	0	0	0	0	0	0	0	0	0	0	0	0	0	0	0	0	0	0	0	1	0	88
20400	037	1	75	2	1	1	1	3	0	8	0	2	3	88	1	1	0	0	0	0	0	0	0	0	0	0	0	0	0	0	0	1	0	1	0	0	0	0	0	1	1	0	0	0	0	0	0	0	88
10900	051	2	75	2	1	7	13	4	0	10	0	4	4	88	0	0	1	0	0	0	0	0	0	1	0	0	0	0	0	0	0	0	0	1	0	0	1	0	0	1	1	0	0	0	1	0	1	1	Cataract medication
10900	047	1	75	2	1	7	13	2	0	4	0	4	1	88	1	0	0	0	0	0	0	0	0	1	0	0	0	0	0	0	0	0	0	0	1	0	0	0	0	0	0	0	0	0	1	0	1	1	Parkinsons Disease
29400	127	2	75	2	1	1	2	1	0	2	0	2	5	Grandson	0	0	0	0	0	0	0	0	0	1	0	0	0	0	0	0	0	0	0	0	0	0	0	0	0	0	0	0	0	0	1	0	0	0	88
7100	106	1	75	2	1	4	4	3	0	2	0	2	5	Children and grandchildren	0	1	0	0	0	0	0	0	0	1	0	0	0	0	0	0	0	0	0	0	0	0	0	0	0	0	0	0	0	0	0	0	0	1	Prostate medication
10500	110	2	75	2	0	3	10	3	1	1	0	2	3	88	1	0	0	0	0	0	0	0	0	1	0	0	0	0	0	0	0	0	1	1	0	0	1	0	0	1	1	1	0	0	0	1	1	1	Dizziness
7100	70	1	75	2	1	1	7	3	0	7	0	2	3	88	0	0	1	0	0	0	0	0	0	0	0	0	0	0	1	0	0	0	0	1	0	0	0	0	0	1	0	0	1	0	0	0	0	0	88
21200	104	1	75	2	1	1	2	4	0	10	0	4	1	88	0	0	1	0	0	0	0	0	0	1	0	0	0	0	0	0	0	0	0	1	0	0	0	0	0	1	0	0	0	0	0	0	0	0	88
3400	066	2	75	2	1	4	1	5	0	10	0	9	5	Grandchild and nephew	0	0	0	0	0	0	0	0	0	1	0	0	0	0	1	0	0	1	1	1	0	0	0	0	0	1	1	0	1	1	0	1	1	0	88
16400	065	1	75	2	1	4	4	3	0	3	0	2	5	Children and grandchildren	1	0	0	0	0	0	0	0	0	1	0	0	0	0	1	0	0	0	1	1	0	0	0	0	0	1	0	0	1	0	1	0	0	0	88
2400	141	2	75	2	3	7	13	5	0	7	0	2	5	Grandchild	0	0	0	0	0	0	0	0	0	0	0	0	0	0	1	0	0	0	0	0	0	0	0	0	0	0	0	0	1	0	0	0	0	0	88
16400	029	1	75	2	1	4	4	3	0	8	0	2	2	88	0	0	0	0	0	0	0	0	0	0	0	0	0	0	0	0	0	0	0	0	0	0	1	1	0	0	0	0	0	0	0	0	0	0	88
20300	052	2	75	2	1	1	10	4	0	9	0	2	4	88	1	0	1	0	0	0	0	0	0	0	0	0	0	0	0	0	0	0	0	1	0	0	0	0	0	1	0	0	0	0	1	0	0	0	88
11300	081	1	75	2	1	7	13	3	0	9	0	2	3	88	1	0	0	0	0	0	0	0	0	0	0	0	0	0	1	0	0	0	0	1	0	0	0	0	0	0	0	0	0	0	0	0	0	0	88
15400	070	1	75	2	1	1	7	1	0	10	0	2	5	Daughter in law and grandchildren	0	0	0	0	0	1	0	0	0	0	0	0	0	0	0	0	0	0	0	0	0	0	0	1	0	0	0	0	0	0	0	0	0	0	88
4402	016	1	75	2	9	1	16	3	0	4	0	2	3	88	0	0	0	0	0	0	0	0	0	1	0	0	0	1	1	0	0	1	0	1	0	0	0	0	0	1	0	0	1	0	0	0	0	0	88
11000	155	1	75	2	1	1	3	4	0	9	0	2	1	88	0	0	0	0	0	0	0	0	0	0	0	0	0	0	0	0	0	0	0	0	0	0	0	1	0	1	1	0	0	0	0	0	0	0	88
6000	060	1	75	2	3	1	13	3	0	6	0	2	3	88	1	0	0	0	0	0	0	0	0	0	0	0	0	0	1	0	0	0	0	1	0	1	0	0	0	1	0	0	1	0	0	0	0	0	88
4001	35	1	75	2	2	7	5	5	0	9	0	2	4	88	1	0	0	0	0	0	0	0	0	0	0	0	0	0	0	0	0	0	0	1	0	0	0	0	0	1	0	0	0	0	0	0	1	0	88
20300	041	2	75	2	1	1	2	5	0	10	0	2	1	88	1	0	0	0	0	0	0	0	0	0	0	0	0	0	1	0	0	0	0	1	0	0	0	0	0	1	0	0	1	0	0	0	0	0	88
21200	060	2	75	2	3	1	2	4	0	7	0	2	1	88	1	0	0	0	0	0	0	0	0	0	0	0	0	0	1	0	0	0	0	1	0	0	0	0	0	1	1	0	1	0	0	0	1	0	88
13100	061	2	75	2	2	7	13	5	0	4	0	9	4	88	0	0	0	0	0	0	0	0	0	0	0	0	0	0	0	0	0	0	0	0	0	0	0	1	0	0	0	0	0	0	0	0	1	0	88
3600	196	2	75	2	1	4	5	5	0	8	0	2	4	88	0	0	0	0	0	0	0	0	0	0	0	0	0	0	0	0	0	0	0	0	0	0	0	0	0	1	0	0	0	0	0	0	1	0	88
6800	035	2	75	2	2	1	10	3	0	8	0	1	3	88	0	0	0	0	0	0	0	0	0	0	0	0	0	0	0	0	0	0	0	0	0	0	1	0	0	0	0	0	0	0	0	0	0	1	Glaucoma medication
6800	040	1	75	2	1	4	5	5	0	2	0	2	4	88	1	0	0	0	0	0	0	0	0	0	0	0	0	0	0	0	0	0	0	0	0	0	0	1	0	0	0	0	0	0	0	0	0	0	88
7002	109	1	75	2	1	4	10	3	0	2	0	2	3	88	0	0	0	0	0	0	0	0	0	0	0	0	0	0	0	0	0	0	0	0	0	0	0	1	0	0	0	0	0	0	0	0	0	0	88
14900	026	2	75	2	1	1	1	3	0	5	0	2	2	88	0	0	0	0	0	0	0	0	0	1	0	0	0	0	0	0	0	0	0	1	0	0	0	0	0	1	0	0	0	0	1	0	0	0	88
20300	066	1	75	2	9	1	2	3	0	9	0	2	3	88	1	0	0	0	0	0	0	0	0	0	0	0	0	0	1	0	0	0	0	1	0	0	0	0	0	1	0	0	1	1	0	0	0	0	88
5600	071	1	75	2	1	7	14	3	0	4	0	2	3	88	0	0	1	0	0	0	0	0	0	1	0	0	0	0	0	0	0	0	0	1	0	0	0	0	0	1	0	0	0	0	1	0	1	0	88
8000	025	2	75	2	2	1	7	4	0	8	0	1	5	Brother	0	1	0	0	0	0	0	0	0	0	0	0	0	0	0	0	0	0	0	0	0	0	0	1	0	0	0	0	0	0	0	0	1	1	Eye medication
8000	063	2	75	2	0	4	4	3	0	5	0	2	2	88	0	0	0	0	0	0	0	0	0	0	0	0	0	0	1	0	0	0	0	1	0	0	0	0	0	1	0	0	1	0	0	0	0	0	88
8000	085	2	75	2	1	4	4	3	0	5	0	2	3	88	0	0	0	0	0	0	0	0	0	0	0	0	0	0	0	0	0	0	0	0	0	0	0	1	0	0	0	0	0	0	0	0	0	0	88
13000	033	1	75	2	2	4	2	3	9	3	0	2	2	88	0	0	0	0	0	0	0	0	0	1	0	0	0	0	1	0	0	0	0	0	0	0	0	0	0	0	0	0	1	0	1	0	0	0	88
6000	026	2	75	2	2	2	13	5	0	6	0	1	4	88	1	0	0	0	0	0	0	0	0	0	0	0	0	0	0	0	0	0	0	0	0	0	0	0	0	1	0	0	0	0	0	0	1	0	88
3400	041	2	75	2	1	1	2	5	0	10	0	9	5	Granddaughter	0	0	0	0	0	0	0	0	0	0	0	0	0	0	0	0	0	1	0	1	0	0	0	0	0	1	1	0	0	0	0	0	0	0	88
7400	011	2	75	2	2	1	2	5	0	10	9	4	1	88	0	0	0	0	0	0	0	0	0	0	0	0	0	0	1	0	0	0	0	0	0	0	0	0	0	0	0	0	1	0	0	0	1	0	88
7400	098	2	75	2	1	1	13	4	0	10	0	9	1	88	0	0	0	0	0	0	0	0	0	0	0	0	0	0	0	0	0	0	0	0	0	0	1	0	0	0	0	1	0	0	0	0	0	0	88
13600	013	2	75	2	1	1	13	3	0	10	0	2	2	88	1	0	0	0	0	0	0	0	0	1	0	0	0	0	0	0	0	0	0	1	0	0	0	0	0	1	0	0	0	0	0	0	0	0	88
19200	012	2	75	2	2	2	13	4	9	4	4	4	5	Sister	1	0	0	0	0	0	0	0	0	0	0	0	0	1	0	0	0	0	0	0	0	0	0	0	0	0	0	0	0	0	0	0	0	1	Depression medication
7000	064	2	75	2	1	1	13	6	0	9	0	2	4	88	1	0	1	0	0	0	0	0	0	0	0	0	0	0	0	0	0	0	0	1	0	0	0	0	0	1	0	0	0	0	0	0	0	0	88
21700	159	2	75	2	1	4	5	5	0	2	0	2	1	88	0	0	0	0	0	0	0	0	0	1	0	0	0	0	0	0	0	0	0	0	0	0	0	0	0	0	0	0	0	0	1	0	0	0	88
6001	113	2	75	2	1	4	10	4	0	8	0	2	1	88	0	0	0	0	0	0	0	0	0	0	0	0	0	0	1	0	0	0	0	0	0	0	0	0	0	0	0	0	1	0	0	0	0	0	88
13100	038	1	75	2	3	1	1	3	0	7	0	9	2	88	0	0	0	0	0	0	0	0	0	0	0	0	0	0	0	0	0	0	0	0	0	0	0	1	0	0	0	0	0	0	0	0	1	0	88
2400	022	1	75	2	3	4	11	3	0	7	0	1	2	88	1	0	0	0	0	0	0	0	0	0	0	0	0	0	1	0	0	0	0	0	0	0	0	0	0	0	0	0	1	0	0	0	1	0	88
8300	024	1	75	2	1	7	13	2	0	3	0	2	1	88	0	0	0	0	0	0	0	0	0	0	0	0	0	0	1	0	0	0	0	0	0	0	0	0	0	0	0	0	0	0	0	0	0	0	88
9600	033	1	75	2	1	5	13	2	0	9	0	2	5	Brother and sister	0	0	0	0	0	0	0	0	0	0	0	0	0	0	0	0	0	0	0	0	0	0	0	0	0	0	0	0	0	0	0	0	0	0	88
7500	039	2	76	2	1	1	2	5	0	7	0	2	5	Children and grandchildren and great grandchildren	1	0	0	0	0	0	0	0	0	1	0	0	0	0	0	0	0	0	0	1	0	0	0	0	0	1	1	0	0	0	0	0	0	0	88
24602	039	2	76	2	1	4	4	3	0	5	0	9	3	88	1	0	0	0	0	0	0	0	0	1	0	0	0	0	1	0	0	1	0	1	0	0	0	0	0	0	0	0	1	1	0	0	0	1	Heart medication
18300	041	2	76	2	1	7	13	1	0	7	0	2	1	88	0	0	1	0	0	0	0	0	0	0	0	0	0	0	0	0	0	0	0	1	0	0	0	0	0	1	0	0	0	0	0	0	1	0	88
33602	171	2	76	2	1	4	5	5	0	5	0	2	1	88	1	0	0	0	0	0	0	0	0	0	0	0	0	0	1	0	0	0	0	1	0	0	0	0	0	1	0	0	1	1	0	0	0	0	88
4300	080	1	76	2	1	7	10	3	0	10	0	2	3	88	1	0	0	0	0	0	0	0	0	0	0	1	0	0	1	0	0	0	0	1	0	0	0	0	0	1	0	0	1	0	0	0	0	0	88
12500	039	2	76	2	1	4	11	5	0	9	0	1	1	88	0	0	0	0	0	0	0	0	0	0	0	0	0	0	0	0	0	0	1	0	0	0	1	0	0	0	0	0	0	0	0	1	0	1	Wheezing medication
5001	51	2	76	2	1	4	10	4	0	9	0	1	9	88	0	0	1	0	0	0	0	0	0	0	0	0	0	0	1	0	0	0	0	1	0	0	0	0	0	1	1	0	0	1	0	0	0	0	88
18000	003	2	76	2	1	4	4	5	0	5	4	2	4	88	0	1	0	0	0	0	0	0	0	1	1	0	0	0	1	0	0	1	0	1	0	0	0	0	0	1	1	0	1	1	1	1	1	1	Heart medication
19802	009	1	76	2	1	4	5	3	0	9	0	2	3	88	1	0	0	0	0	1	0	0	0	0	0	0	0	0	0	0	0	0	0	0	0	0	0	1	0	0	0	0	0	0	0	0	1	1	Stroke medication
28100	115	2	76	2	2	7	13	4	0	7	0	2	4	88	1	0	0	0	0	0	1	0	0	0	0	0	0	0	0	0	0	0	1	1	0	0	0	0	0	1	0	0	0	0	0	1	1	0	88
4300	076	2	76	2	1	1	10	5	0	10	0	2	1	88	0	0	0	0	0	0	0	0	0	1	0	0	0	0	0	0	0	0	1	0	0	0	0	0	0	0	0	0	0	0	1	1	0	0	88
28100	131	2	76	2	3	7	1	3	0	7	0	2	2	88	1	0	0	0	0	0	1	0	0	0	0	1	0	0	1	0	0	0	1	0	0	0	0	0	0	0	0	0	1	0	0	1	0	1	Cancer medication
6700	116	2	76	2	4	1	14	5	0	3	0	2	4	88	0	0	0	0	0	0	0	0	0	0	0	0	0	0	0	0	0	0	0	0	0	0	0	1	0	0	0	0	0	0	0	0	1	0	88
29400	038	2	76	2	3	5	1	5	0	7	0	2	5	Grandson	0	0	0	0	0	1	0	0	0	0	0	0	0	0	0	0	0	0	0	0	0	0	0	1	0	0	0	0	0	0	0	0	1	0	88
18000	034	2	76	2	1	7	3	5	0	10	0	2	5	Grandchildren	0	0	0	0	0	0	0	0	0	0	0	0	0	0	0	0	0	0	0	0	0	0	0	1	0	0	0	0	0	0	0	0	0	0	88
7300	152	2	76	2	1	4	4	5	0	2	0	2	4	88	0	0	0	0	0	0	0	0	0	0	0	0	0	0	0	0	0	0	0	0	0	0	1	0	0	0	0	0	0	0	0	0	0	1	Eye medication
1000	121	2	76	2	1	4	11	3	0	5	0	2	2	88	1	0	0	0	0	0	0	0	0	1	0	0	0	0	0	0	0	0	0	1	0	0	0	0	0	1	0	0	0	0	1	0	0	0	88
16600	009	2	76	2	1	4	10	5	0	5	0	2	4	88	1	0	0	0	0	0	0	0	0	0	0	0	0	0	0	0	0	0	0	1	0	0	0	0	0	1	0	0	0	0	0	0	0	0	88
16600	016	2	76	2	1	3	13	5	1	1	0	2	5	Brother	1	0	0	0	0	0	0	0	0	0	0	0	0	0	0	0	0	0	0	0	0	0	0	1	0	0	0	0	0	0	0	0	0	0	88
16600	046	1	76	2	1	4	4	5	0	2	0	2	1	88	0	0	0	0	0	0	0	0	0	0	0	0	0	0	0	0	0	0	0	0	0	0	0	0	0	0	0	0	0	0	0	0	0	0	88
12500	003	1	76	2	1	4	4	3	0	8	0	1	3	88	1	0	0	0	0	0	0	0	0	0	0	0	0	0	1	0	0	0	0	1	0	0	1	0	0	1	0	0	0	0	0	0	0	1	Cataract medication
4402	022	2	76	2	1	5	5	5	0	5	0	2	3	88	1	0	0	0	0	0	0	0	0	0	0	0	0	0	0	0	0	0	0	1	0	0	0	0	0	1	0	0	0	0	0	0	0	0	88
5600	104	2	76	2	1	4	4	5	0	5	0	2	1	88	0	0	0	0	0	0	0	0	0	1	0	0	0	0	0	0	0	0	0	1	0	0	0	0	0	0	1	0	0	0	1	0	0	0	88
7300	089	2	76	2	1	4	4	5	0	10	0	2	4	88	0	0	1	0	0	0	0	0	0	1	0	0	0	0	0	0	0	0	0	1	0	0	0	0	0	1	0	0	0	0	1	0	0	0	88
15500	018	1	76	2	2	7	13	3	0	7	0	4	3	88	0	1	0	0	0	0	0	0	0	0	0	0	0	0	0	0	0	0	0	1	0	0	0	0	0	1	1	0	0	0	0	0	0	0	88
26002	035	2	76	2	1	1	13	3	0	9	0	2	2	88	0	0	0	0	0	1	0	0	0	0	0	0	0	0	1	0	0	0	0	1	0	0	0	0	0	1	0	0	1	0	0	0	0	0	88
12400	045	1	76	2	1	4	4	3	1	1	0	2	3	88	0	0	0	0	0	0	0	0	0	1	0	0	0	0	0	0	0	0	0	0	0	0	0	0	0	0	0	0	0	0	0	0	0	1	Arthritis medication
500	042	2	76	2	2	10	13	3	0	7	0	2	2	88	1	0	0	0	0	0	0	0	0	0	0	0	0	0	0	0	0	1	0	1	0	0	0	0	0	1	0	0	0	0	0	0	0	0	88
15800	050	2	76	2	1	1	2	5	0	8	0	2	4	88	0	0	0	0	0	0	1	0	0	0	0	0	0	0	0	0	0	0	0	1	0	0	0	0	0	1	0	0	0	0	0	0	1	0	88
5001	88	1	76	2	1	4	4	5	0	10	0	2	4	88	0	0	1	0	0	0	0	0	0	0	0	0	0	0	1	0	0	0	0	1	0	1	0	0	0	1	0	0	1	0	0	0	0	0	88
700	121	2	76	2	1	7	13	5	0	2	0	2	1	88	1	0	0	0	0	0	0	0	0	0	0	0	0	0	1	0	0	0	1	1	0	0	0	0	0	1	1	0	1	0	0	1	1	0	88
16800	044	1	76	2	0	4	4	3	1	1	0	2	3	88	0	0	0	0	0	0	0	0	0	1	0	0	0	0	1	0	0	0	0	0	0	0	0	0	0	0	0	0	1	0	1	0	0	0	88
21000	030	1	76	2	1	1	2	5	0	9	4	3	1	88	1	0	0	0	0	0	0	0	0	1	0	1	0	0	0	0	0	0	0	0	0	0	1	0	0	0	0	0	0	0	1	0	0	1	Prostate medication
700	026	2	76	2	1	7	13	5	0	5	0	2	5	Children and family	1	0	0	0	0	0	0	0	0	0	0	0	0	0	1	0	0	1	0	1	0	0	0	0	0	1	1	0	1	0	1	0	1	0	88
19100	063	2	76	2	1	4	13	6	9	4	0	1	5	Grandchildren daughter in law and children	0	1	0	0	0	0	0	0	0	0	0	0	0	0	1	0	0	0	0	0	0	0	0	0	0	0	0	0	1	0	0	0	0	0	88
15800	051	2	76	2	1	1	10	5	0	5	0	2	4	88	0	0	0	0	0	0	0	0	0	0	0	0	0	0	1	0	0	0	0	0	0	0	0	0	0	0	0	0	1	0	0	0	0	0	88
5600	062	1	76	2	1	7	13	3	1	1	0	4	3	88	0	0	1	0	0	0	0	0	0	1	0	0	0	0	1	0	0	0	0	0	0	0	1	0	0	0	0	0	1	0	1	0	0	1	Cataract medication
15500	060	1	76	2	2	1	13	4	0	9	0	2	4	88	0	0	0	0	0	0	0	0	0	0	0	0	0	0	0	0	0	0	0	1	0	0	0	0	0	1	0	0	0	0	0	0	0	0	88
18300	025	1	76	2	3	7	13	4	0	4	0	2	5	Nephew	0	0	0	0	0	0	0	0	0	0	0	0	0	0	0	0	0	0	0	0	0	0	0	1	0	0	0	0	0	0	0	0	1	0	88
30502	059	2	76	2	2	7	2	5	0	5	0	2	4	88	0	0	1	0	0	0	0	0	0	1	0	0	0	0	0	0	0	0	0	1	0	0	0	0	0	1	0	0	0	0	1	0	0	0	88
13100	005	1	76	2	1	1	13	5	0	10	0	2	5	Child niece granddaughter and brother	0	0	0	0	0	0	0	0	0	0	0	0	0	0	0	0	0	0	0	0	0	0	1	0	0	0	0	0	0	0	0	0	0	1	Prostate medication
18300	136	1	76	2	3	4	10	3	0	7	0	2	3	88	1	0	0	0	0	0	0	0	0	0	0	0	0	0	0	0	0	0	0	0	0	0	0	1	0	0	0	0	0	0	0	0	1	0	88
10900	079	1	76	2	1	7	16	3	9	8	0	4	2	88	0	0	1	0	0	0	0	0	0	0	0	0	0	0	0	0	0	0	0	0	0	0	0	1	0	0	0	0	0	0	0	0	0	0	88
13600	042	2	76	2	3	7	2	2	0	6	0	2	4	88	0	0	0	0	0	0	0	0	0	0	0	0	0	0	0	0	0	0	0	0	0	0	0	1	0	0	0	0	0	0	0	0	0	0	88
4301	027	1	76	2	0	4	10	4	0	10	0	2	1	88	1	0	1	0	0	0	0	0	0	0	0	0	0	0	0	0	0	0	0	0	1	0	0	0	0	0	0	0	0	0	0	0	0	0	88
14900	077	1	76	2	1	1	1	5	0	8	0	1	5	Child and grandson	1	0	0	0	0	0	0	0	0	0	0	0	0	0	0	0	0	0	0	0	0	1	0	0	0	0	0	0	0	0	1	0	0	0	88
4700	032	1	76	2	2	4	11	3	0	4	0	4	3	88	0	1	1	0	0	0	0	0	0	0	0	0	0	0	0	0	0	0	0	1	1	0	1	0	0	1	0	0	0	0	1	0	1	0	88
19700	053	2	76	2	3	7	13	3	9	3	0	3	3	88	0	1	0	0	0	1	0	0	0	0	0	0	0	0	1	0	0	0	1	1	0	0	0	0	0	1	0	0	1	0	0	1	0	0	88
15500	007	1	76	2	2	4	11	4	0	10	0	1	5	Nephew	0	0	0	0	0	1	0	0	0	0	0	0	0	0	0	0	0	0	0	0	0	0	1	0	0	0	0	0	0	0	1	0	0	1	Sinus medication
15400	049	2	76	2	1	4	10	5	0	10	0	2	1	88	1	0	0	0	0	0	0	0	0	1	0	0	0	0	0	0	1	0	1	1	0	1	0	0	0	1	0	0	0	0	1	1	1	0	88
4402	016	2	76	2	9	1	17	3	0	99	0	2	3	88	0	0	1	0	0	0	0	0	0	0	0	0	0	0	1	0	0	0	0	1	0	0	0	0	0	1	0	0	1	0	0	0	0	0	88
11000	171	2	76	2	1	1	3	4	0	8	0	2	4	88	0	0	0	0	0	0	0	0	0	0	0	0	0	0	0	0	0	0	0	0	0	0	0	1	0	0	0	0	0	0	0	0	0	0	88
4302	290	1	76	2	2	4	4	5	0	9	0	2	1	88	0	0	0	0	0	0	0	0	0	0	0	0	0	0	0	0	0	0	0	1	0	0	0	0	0	1	0	0	0	0	0	0	0	0	88
6000	013	1	76	2	2	1	1	1	0	7	0	4	1	88	0	0	0	0	0	0	0	0	0	0	0	0	0	0	0	0	0	0	0	1	0	1	0	0	0	1	0	0	0	0	1	0	1	0	88
31900	018	1	76	2	2	5	1	1	0	7	0	3	4	88	0	0	1	0	0	1	0	0	0	0	0	0	0	0	0	0	0	0	0	0	0	0	0	0	0	0	0	0	0	0	0	0	0	1	Joint pains
5600	035	1	76	2	1	4	10	3	0	1	0	2	4	88	1	0	0	0	0	0	0	0	0	0	0	0	0	0	0	0	0	0	1	0	0	0	1	0	0	0	1	0	0	0	0	1	1	1	Prostate medication
7300	156	1	76	2	1	4	13	3	0	1	0	4	2	88	0	0	0	0	0	0	0	0	0	0	0	0	0	0	0	0	0	0	1	0	0	0	0	0	0	0	0	0	0	0	0	1	1	0	88
7300	156	2	76	2	9	4	10	3	0	5	0	4	2	88	0	0	0	0	0	0	0	0	0	1	0	0	0	0	0	0	0	0	1	1	0	0	0	0	0	1	0	0	0	0	1	1	1	0	88
8600	012	2	76	2	1	7	13	5	0	5	0	2	4	88	0	0	0	0	0	0	0	0	0	0	0	0	0	0	1	0	0	0	0	0	0	0	0	0	0	0	0	0	0	0	0	0	0	1	Local herb medication
18000	046	2	76	2	1	4	13	4	0	8	0	2	5	Sister brother and nephew	0	0	1	0	0	0	0	0	0	0	0	0	0	0	0	0	0	0	0	1	0	0	0	0	0	1	0	0	0	0	0	0	0	0	88
18000	075	2	76	2	1	1	2	5	0	10	0	2	5	Children and grandchildren	0	1	0	0	0	0	0	0	0	0	0	0	0	0	1	0	0	0	1	1	0	0	0	0	0	1	1	0	1	0	0	1	0	0	88
18000	058	2	76	2	1	1	13	3	0	7	0	2	5	Sister	0	0	0	0	0	0	0	0	0	0	0	0	0	0	1	0	0	0	0	0	0	0	0	0	0	1	0	0	0	0	0	0	0	0	88
19400	074	1	76	2	1	1	16	4	0	9	4	3	4	88	0	0	0	0	0	0	1	0	0	0	0	0	0	0	0	0	0	0	0	0	0	0	0	1	0	0	1	0	0	0	0	0	1	0	88
7000	057	1	76	2	1	5	13	3	0	99	0	2	3	88	0	0	0	0	0	0	0	0	0	0	0	0	0	0	0	0	0	0	0	0	0	0	0	1	0	0	0	0	0	0	0	0	0	0	88
3400	030	2	76	2	1	7	13	5	0	3	0	9	5	Son and grandson	0	0	0	0	0	0	0	0	0	0	0	0	0	0	0	0	0	0	0	0	0	0	0	1	0	0	0	0	0	0	0	0	1	0	88
13000	030	2	76	2	2	3	13	5	0	5	0	2	2	88	0	0	0	0	0	0	0	0	0	0	0	0	0	0	1	0	0	0	0	0	0	0	0	0	0	0	0	0	1	0	0	0	0	0	88
3701	057	2	76	2	1	5	13	5	0	2	0	2	5	Children and father	0	0	0	0	0	0	0	0	0	0	0	0	0	0	0	0	0	0	0	0	0	0	0	0	0	1	0	0	0	0	0	0	0	0	88
4402	062	2	76	2	1	1	1	5	0	8	0	2	4	88	1	0	0	0	0	0	0	0	0	1	0	0	0	0	0	0	1	0	1	0	0	0	0	0	0	0	1	0	0	0	0	0	0	0	88
13000	042	1	76	2	2	4	5	3	0	3	0	2	2	88	0	0	0	0	0	0	0	0	0	0	0	0	0	0	1	0	0	0	0	1	0	0	0	0	0	1	0	0	0	0	1	0	0	0	88
3200	053	2	76	2	1	4	4	5	1	1	0	2	4	88	0	0	0	0	0	0	0	0	0	1	0	0	0	0	0	0	0	0	0	0	0	0	0	0	0	0	0	0	0	0	1	0	1	0	88
13100	120	1	76	2	1	7	13	4	0	10	0	4	1	88	0	0	0	0	0	0	0	0	0	0	0	0	0	0	0	0	0	0	0	0	0	0	0	1	0	0	0	0	0	0	0	0	0	0	88
13000	032	2	76	2	1	1	13	5	0	5	0	1	1	88	0	0	0	0	0	0	0	0	0	1	0	0	0	0	0	0	0	0	0	0	0	0	0	0	0	0	0	0	0	0	1	0	0	0	88
3602	031	1	76	2	2	4	5	3	0	3	0	2	2	88	0	0	0	0	0	0	0	0	0	0	0	0	0	0	0	0	0	0	0	0	0	0	0	1	0	0	0	0	0	0	0	0	0	0	88
5100	041	2	76	2	3	1	13	3	9	7	0	2	3	88	0	0	0	0	0	0	0	0	0	0	0	0	0	0	0	0	0	0	0	1	0	0	0	1	0	1	1	0	0	0	0	0	1	0	88
5500	009	1	76	2	1	4	4	3	0	8	0	2	3	88	0	0	0	0	0	0	0	0	0	0	0	0	0	0	0	0	0	0	0	1	0	0	0	0	0	1	0	0	0	0	0	0	0	0	88
5500	001	2	76	2	1	1	13	3	9	5	0	2	3	88	0	0	0	0	0	0	0	0	0	0	0	0	0	0	0	0	0	0	0	1	0	0	0	0	0	1	0	0	0	0	0	0	0	0	88
3400	011	1	76	2	2	1	2	3	0	4	0	9	3	88	0	0	0	0	0	0	0	0	0	0	0	0	0	0	0	0	0	0	0	0	0	0	0	1	0	0	0	0	0	0	0	0	1	0	88
3400	064	2	76	2	2	5	6	6	0	3	0	9	1	88	0	0	0	0	0	0	0	0	0	0	0	0	0	0	1	0	0	0	0	0	0	0	0	0	0	0	0	0	1	0	0	0	0	0	88
13100	057	2	76	2	2	7	13	3	0	4	0	9	2	88	0	0	0	0	0	0	0	0	0	0	0	0	0	0	1	0	0	0	0	1	0	0	0	0	0	1	1	0	1	0	0	0	1	0	88
1800	060	2	76	2	1	1	10	5	0	5	0	2	5	Children inlaw and grandchildren	1	0	0	0	0	0	0	0	0	0	0	0	0	0	0	0	0	0	0	0	0	0	0	1	0	0	0	0	0	0	0	0	1	0	88
29400	062	2	76	2	2	7	13	3	0	5	0	2	2	88	1	0	0	0	0	0	0	0	0	0	0	0	0	0	0	0	0	0	0	0	0	0	0	1	0	1	1	0	0	0	1	1	1	0	88
8000	117	2	76	2	1	5	13	3	0	5	0	2	3	88	0	1	0	0	0	0	0	0	0	0	0	0	0	0	0	0	0	0	0	0	0	0	1	0	0	0	0	0	0	0	0	0	1	0	88
6001	83	2	76	2	1	4	4	5	0	10	0	2	3	88	0	0	0	0	0	0	0	0	0	0	0	0	0	0	0	0	0	0	0	1	0	0	0	0	0	1	0	0	0	0	0	0	0	0	88
19200	037	1	76	2	3	7	13	3	0	6	0	2	2	88	0	0	0	0	0	0	0	0	0	0	0	0	0	0	1	0	0	0	0	1	0	0	0	0	0	1	0	1	0	0	0	0	0	0	88
3400	09	2	76	2	1	4	4	5	0	5	0	1	4	88	0	0	1	0	0	0	0	0	0	1	0	0	0	0	0	0	0	0	0	0	0	0	0	0	0	0	0	0	0	0	1	0	0	0	88
6800	004	2	76	2	1	1	13	5	1	1	0	6	1	88	0	0	0	0	0	0	0	0	0	1	0	1	0	0	1	0	0	0	1	1	0	0	0	0	0	0	0	0	0	0	0	0	0	0	88
16800	048	2	77	2	1	4	4	5	0	5	0	1	5	Children grandchildren daughter in law	1	0	0	0	0	0	0	0	0	0	0	0	0	0	0	0	0	1	1	1	0	0	0	0	0	1	1	0	0	0	0	1	0	1	Heart medication
21700	140	2	77	2	1	4	4	3	0	5	0	2	2	88	0	0	0	0	0	0	0	0	0	1	0	0	0	0	1	0	0	1	0	1	0	0	0	0	0	1	1	0	1	0	0	0	0	0	88
6700	060	2	77	2	9	4	13	3	0	5	0	2	3	88	0	0	1	0	0	0	0	0	0	1	0	0	0	0	0	0	0	0	0	0	0	0	0	0	0	0	0	0	0	0	1	0	0	0	88
3500	109	1	77	2	1	7	10	5	0	9	0	2	4	88	1	0	1	0	0	0	0	0	0	0	0	0	0	0	0	0	0	0	0	1	0	0	0	0	0	1	0	0	0	0	0	0	0	0	88
13200	135	1	77	2	1	4	4	5	0	1	0	1	1	88	1	0	0	0	0	0	0	0	0	0	0	0	0	0	0	0	0	0	1	1	0	1	0	0	0	1	1	0	0	0	1	1	0	0	88
5900	049	2	77	2	1	5	13	4	0	5	0	2	5	Daughter in law son and grandchild	1	0	1	0	0	0	0	0	0	0	0	0	0	0	0	0	0	0	0	1	1	0	0	0	0	1	0	0	0	0	0	0	1	1	Parkinsons Disease
5100	041	1	77	2	3	1	13	3	0	7	0	2	3	88	0	0	0	0	0	0	1	0	0	0	0	0	0	0	0	0	0	0	0	1	0	1	0	0	0	1	1	0	0	0	1	0	1	0	88
6700	120	1	77	2	1	4	13	3	0	4	0	2	2	88	1	0	0	0	0	0	0	0	0	0	0	0	0	0	1	0	0	0	0	1	0	0	0	0	0	1	1	0	1	0	0	0	0	0	88
16800	075	2	77	2	1	4	5	5	0	5	0	1	4	88	1	0	0	0	0	0	0	0	0	1	0	0	0	0	0	0	0	0	0	0	0	0	0	0	0	0	0	0	0	0	1	0	0	0	88
16800	080	2	77	2	1	4	10	5	0	2	0	2	5	Children and granddaughter in law	1	0	0	0	0	0	0	0	0	1	0	0	0	0	0	0	1	0	0	1	0	0	0	0	0	1	0	0	0	0	1	0	0	1	Bone illness
33602	079	2	77	2	1	7	13	5	0	5	0	2	1	88	1	0	1	0	0	0	0	0	0	0	0	0	0	0	1	0	0	1	0	1	0	0	0	0	0	1	0	0	1	1	1	1	0	0	88
900	080	1	77	2	0	7	2	3	0	8	0	2	2	88	1	0	1	0	0	0	0	0	0	0	0	0	0	0	0	0	0	1	0	1	0	0	0	0	0	0	1	0	0	0	0	0	1	1	Heart medication
3601	114	2	77	2	1	1	13	5	0	5	0	2	1	88	1	0	0	0	0	0	0	0	0	1	0	0	0	0	0	0	0	0	0	0	0	0	0	0	0	0	0	0	0	0	1	0	1	0	88
28100	131	1	77	2	3	1	1	3	0	99	0	2	2	88	1	0	0	0	0	0	0	0	0	0	0	0	0	0	1	0	0	0	0	1	0	0	1	0	0	1	0	0	1	1	0	0	0	1	Prostate medication
16100	141	2	77	2	9	4	4	5	0	5	0	2	4	88	1	0	0	0	0	0	0	0	0	1	0	0	0	0	0	0	0	0	0	0	0	0	0	0	0	0	0	0	0	0	1	0	0	0	88
16100	008	2	77	2	9	4	4	3	0	1	0	2	2	88	1	0	0	0	0	0	0	0	0	0	0	0	0	0	0	0	0	1	0	1	0	0	0	0	0	1	1	1	0	0	0	0	0	0	88
12500	022	2	77	2	1	4	10	5	0	5	0	1	5	Grandchild	0	0	0	0	0	0	0	0	0	1	0	0	0	0	0	0	0	0	0	0	0	0	1	0	0	0	0	0	0	0	1	0	0	1	Cataract medication
3500	106	1	77	2	1	1	14	4	0	9	0	2	1	88	0	0	1	0	0	0	0	0	0	1	0	0	0	0	1	0	0	0	0	1	0	0	0	0	0	1	1	0	1	1	0	0	0	0	88
3601	238	1	77	2	3	1	1	3	0	7	0	2	3	88	1	0	0	0	0	0	0	0	0	0	0	0	0	0	0	0	0	0	0	0	0	0	1	0	0	0	0	0	0	0	0	0	0	1	Prostate medication
8600	029	2	77	2	1	4	4	5	0	10	0	1	4	88	0	0	1	0	0	0	0	0	0	1	0	0	0	0	1	0	0	0	0	1	0	0	0	0	0	1	0	0	1	0	1	0	0	0	88
13700	051	2	77	2	1	4	5	5	0	1	0	2	4	88	0	0	1	0	0	0	0	0	0	1	0	0	0	0	0	0	0	1	0	0	0	0	0	0	0	0	0	0	0	0	1	0	0	1	Heart medication
15500	062	2	77	2	1	7	10	3	0	4	0	2	3	88	1	0	0	0	0	0	0	0	0	0	0	0	0	0	0	0	0	0	0	0	0	0	0	1	0	0	0	0	0	0	1	0	1	0	88
26002	015	1	77	2	2	1	13	5	0	7	0	1	5	Children and grandchildren	0	0	0	0	0	0	0	0	0	0	0	0	0	0	0	0	0	0	0	0	0	0	0	1	0	0	0	0	0	0	0	0	0	0	88
12400	011	1	77	2	1	4	4	3	0	8	0	2	3	88	0	0	0	0	0	0	0	0	0	0	0	0	0	0	0	0	0	0	0	1	0	0	0	0	0	1	0	0	0	0	0	0	0	0	88
25900	124	2	77	2	1	7	1	3	0	10	0	2	3	88	0	0	1	0	0	0	0	0	0	1	0	0	0	1	1	0	0	1	1	1	0	0	1	0	0	1	1	0	1	0	0	1	1	1	Heart and thyroid
8000	050	1	77	2	1	7	13	3	9	6	0	3	2	88	0	1	0	0	0	0	0	0	0	0	0	1	0	0	0	0	0	0	0	1	0	0	0	0	0	0	0	0	0	0	0	0	1	1	Hypertension
25900	099	2	77	2	3	1	7	3	0	7	0	2	2	88	0	0	0	0	0	0	0	0	0	1	0	0	0	0	0	0	0	1	1	0	0	1	0	0	0	0	1	0	0	0	0	0	0	1	Heart medication
15500	045	2	77	2	1	7	10	3	0	9	0	2	3	88	0	0	0	0	0	0	1	0	0	0	0	0	0	0	0	0	0	0	0	1	0	0	0	0	0	1	0	0	0	0	0	0	0	0	88
22700	002	2	77	2	2	1	1	1	0	10	4	3	5	Son and grandson	0	0	0	0	0	0	1	0	0	0	0	0	0	0	0	0	0	0	1	0	0	0	0	0	0	0	0	0	0	0	0	0	0	0	88
21200	127	1	77	2	1	1	16	4	0	9	0	4	1	88	0	0	0	0	0	0	0	0	0	0	0	0	0	0	0	0	0	0	0	0	0	0	0	1	0	0	0	0	0	0	0	0	1	0	88
500	042	1	77	2	2	10	13	3	0	6	0	2	2	88	1	0	0	0	0	0	0	0	0	0	0	0	0	0	1	0	0	0	0	1	0	0	0	0	0	1	0	0	1	0	0	0	0	1	Prostate medication
21200	035	2	77	2	2	1	13	5	0	10	0	2	1	88	1	0	0	0	0	0	0	0	0	0	0	0	0	0	0	0	0	0	0	1	0	0	0	0	0	1	1	0	0	0	0	0	1	0	88
21700	135	1	77	2	3	4	11	3	0	6	0	2	2	88	0	0	0	0	0	0	1	0	0	0	0	0	0	0	1	0	0	0	0	0	0	0	0	1	0	0	0	0	1	0	0	0	0	1	Eye medication
6000	040	1	77	2	1	1	8	4	0	9	0	2	4	88	1	0	0	0	0	0	0	0	0	1	0	0	0	0	0	0	0	0	0	0	0	0	0	0	0	0	0	0	0	0	0	0	1	0	88
500	086	1	77	2	1	1	13	4	0	7	0	2	1	88	1	0	0	0	0	0	0	0	0	0	0	0	0	0	0	0	0	0	0	1	0	0	0	0	0	1	0	0	0	0	0	0	0	0	88
21700	144	2	77	2	3	1	13	3	0	4	0	2	2	88	0	0	0	0	0	0	0	0	0	0	0	0	0	0	1	0	0	0	1	1	0	0	0	1	0	1	1	0	0	0	0	1	1	0	88
4202	091	2	77	2	1	4	4	5	0	5	0	2	5	Children and grandchildren	0	0	0	0	0	0	0	0	0	1	0	0	0	0	1	0	0	0	0	1	0	0	0	0	0	1	0	0	1	0	0	0	0	0	88
5600	152	1	77	2	1	7	14	3	0	3	0	2	3	88	0	0	1	0	0	0	0	0	0	0	0	0	0	0	0	0	0	0	0	0	0	0	1	0	0	0	0	0	0	0	0	0	0	1	Prostate and cataract
29400	128	1	77	2	4	1	13	1	0	8	0	2	5	Sister	0	0	0	0	0	0	0	0	0	0	0	0	0	0	0	0	0	0	0	0	0	0	0	1	0	0	0	0	0	0	0	0	0	0	88
2200	139	2	77	2	1	1	1	5	0	2	0	1	1	88	0	0	0	0	0	0	0	0	0	1	0	0	0	0	0	0	0	0	0	1	0	0	0	0	0	1	0	0	0	0	1	0	0	0	88
2200	131	1	77	2	1	4	4	3	0	9	0	2	5	Spouse and son	0	0	1	0	0	0	0	0	0	1	0	0	0	0	1	0	0	1	0	0	0	0	0	0	0	0	0	0	1	0	1	0	0	0	88
8300	042	1	77	2	1	1	13	3	0	6	0	2	2	88	0	0	0	0	0	0	0	0	0	0	0	0	0	0	0	0	0	0	0	0	0	0	0	1	0	0	0	0	0	0	0	0	0	0	88
30502	76	2	77	2	2	1	10	5	0	8	0	9	4	88	0	0	0	0	0	1	0	0	0	0	0	0	0	0	0	0	0	0	0	0	0	0	0	1	0	0	0	0	0	0	0	0	0	1	Eye medication
6000	041	2	77	2	1	1	10	5	0	5	0	2	4	88	0	0	0	0	0	0	0	0	0	0	0	0	0	0	0	0	0	0	0	0	0	0	0	0	0	0	0	0	0	0	0	0	0	0	88
16800	142	2	77	2	2	4	11	5	0	7	0	2	5	Son grandchildren and daughter in law	1	0	0	0	0	0	0	0	0	0	0	0	0	1	0	0	0	0	0	0	0	0	0	0	0	0	0	0	0	0	0	0	0	1	Fluid in eyes medication
1900	141	1	77	2	1	7	10	5	0	6	0	2	1	88	0	0	0	0	0	0	0	0	0	1	0	0	0	0	0	0	0	0	0	0	0	0	0	0	0	0	0	0	0	0	0	0	0	0	88
19802	165	1	77	2	3	4	10	2	1	7	0	2	1	88	0	0	0	0	0	0	0	0	0	0	0	0	0	0	0	0	0	0	0	0	0	0	0	1	0	0	0	0	0	0	0	0	1	0	88
1800	090	1	77	2	2	1	1	5	0	6	0	1	5	Children and grandchildren	1	0	0	0	0	0	0	0	0	0	0	0	0	0	1	0	0	0	0	1	0	0	0	0	0	1	0	0	1	0	0	0	1	0	88
9601	009	2	77	2	1	1	2	5	9	5	2	3	5	Grandchildren and children	0	0	0	0	0	0	0	0	0	0	0	0	0	0	1	0	0	0	0	0	0	0	0	0	0	1	0	0	1	0	1	0	0	0	88
22700	002	1	77	2	2	1	14	3	0	8	4	3	2	88	0	0	0	0	0	0	0	0	0	0	0	0	0	0	0	0	0	0	0	0	0	0	0	0	0	0	0	0	0	0	0	0	0	0	88
2400	019	2	77	2	3	1	13	5	0	6	0	2	4	88	1	0	0	0	0	0	0	0	0	0	0	0	0	0	0	0	0	0	0	0	0	0	0	1	0	0	0	0	0	0	0	0	1	0	88
13700	068	2	77	2	0	4	4	5	0	1	0	2	4	88	0	1	0	0	0	0	0	0	0	0	1	0	0	0	0	0	0	0	0	0	0	0	0	0	0	0	0	0	0	0	0	0	0	1	Asthma medication
9001	013	2	77	2	1	1	10	6	9	7	0	2	1	88	1	0	0	0	0	0	0	0	0	0	0	0	0	0	0	0	0	1	0	1	0	0	0	0	0	1	1	0	0	0	0	0	0	0	88
3400	015	1	77	2	2	1	13	2	0	3	0	9	2	88	0	0	0	0	0	0	0	0	0	0	0	0	0	0	0	0	0	0	0	1	0	0	0	0	0	1	1	0	0	0	0	0	1	0	88
3400	054	2	77	2	1	1	13	4	0	5	0	9	4	88	0	0	0	0	0	0	0	0	0	0	0	0	0	0	0	0	0	0	0	0	0	0	0	1	0	0	0	0	0	0	0	0	0	0	88
26001	039	1	77	2	3	1	13	3	9	3	0	2	2	88	0	0	0	0	0	0	0	0	0	0	0	0	0	0	0	0	0	0	0	0	0	0	0	1	0	0	0	0	0	0	0	0	0	0	88
28100	120	2	77	2	2	1	1	3	0	5	0	2	2	88	1	0	0	0	0	0	0	0	0	1	0	0	0	0	0	0	0	0	0	1	0	0	0	0	0	1	0	0	0	0	0	0	0	0	88
8300	009	1	77	2	1	1	13	5	0	10	0	2	4	88	1	0	0	0	0	0	0	0	0	0	0	0	0	0	0	0	0	0	0	0	0	0	0	1	0	0	0	0	0	0	0	0	0	1	Eye medication
13100	038	2	77	2	3	1	1	3	0	3	0	9	2	88	0	0	0	0	0	0	0	0	0	0	0	0	0	0	0	0	0	0	0	0	0	0	0	1	0	0	0	0	0	0	0	0	0	0	88
4700	017	1	77	2	1	4	5	5	0	4	0	2	4	88	0	0	0	0	0	0	0	0	0	0	0	0	0	0	0	0	0	0	0	0	0	0	0	1	0	0	1	0	0	0	0	0	1	0	88
5001	024	1	77	2	9	4	16	5	0	9	0	2	5	Children and grandchildren	1	0	0	0	0	0	0	0	0	0	0	0	0	0	0	0	0	0	0	0	0	0	1	0	0	0	0	0	0	0	1	0	0	1	ICAP for eyes
2200	114	2	78	2	1	4	4	5	0	5	0	1	5	Grandson and wife	0	0	1	0	0	0	0	0	0	1	0	0	0	0	0	0	0	0	0	1	0	0	0	0	0	1	0	0	0	0	0	0	0	0	88
700	133	2	78	2	1	1	1	3	0	2	0	2	2	88	0	0	0	0	0	0	0	0	0	1	0	0	0	0	0	0	0	0	0	0	0	0	0	0	0	0	0	0	0	0	1	0	1	0	88
13200	117	1	78	2	1	4	4	3	0	10	0	1	3	88	1	0	0	0	0	0	0	0	0	0	1	0	0	0	1	0	0	0	0	0	0	0	0	0	0	0	0	0	1	0	1	0	1	0	88
27300	039	2	78	2	1	4	4	3	9	5	0	1	2	88	1	0	0	0	0	0	0	0	0	0	0	0	0	0	0	0	0	0	0	0	0	0	1	0	0	0	0	0	0	0	0	0	0	1	Ventolin inhaler
27300	125	2	78	2	1	4	4	3	0	5	0	1	3	88	1	0	0	0	0	0	0	1	0	1	0	0	0	0	0	0	0	0	0	0	0	0	1	0	0	0	0	0	0	0	1	0	0	0	88
3500	121	2	78	2	0	4	13	5	0	2	0	2	1	88	0	0	1	0	0	0	0	0	0	1	0	0	0	0	1	0	0	1	0	0	0	0	0	0	0	0	0	0	1	0	1	0	0	0	88
3500	206	2	78	2	1	5	13	4	0	8	0	2	4	88	1	0	0	0	0	0	0	0	0	1	0	0	0	0	1	0	0	0	1	1	0	0	0	0	0	1	1	0	1	0	1	1	0	0	88
25400	131	2	78	2	1	4	5	5	0	5	0	1	4	88	0	0	0	0	0	0	0	0	0	1	0	0	0	0	0	0	0	0	0	0	0	0	0	0	0	0	0	0	0	0	0	0	1	0	88
4300	032	1	78	2	1	4	10	3	0	10	0	2	3	88	0	1	0	0	0	0	1	0	0	0	0	0	0	0	0	0	0	1	0	1	0	0	0	0	0	0	1	1	0	0	0	0	0	1	Heart medication
33602	99	1	78	2	1	7	13	3	0	7	9	2	3	88	1	0	0	0	0	0	0	0	0	0	0	0	0	0	0	0	0	1	0	0	0	0	0	0	0	0	1	0	0	0	0	0	0	1	Heart medication
16800	079	2	78	2	1	1	2	5	0	10	0	2	5	Children and grandchildren	1	0	0	0	0	0	0	0	0	1	0	0	0	0	0	0	0	1	0	1	0	0	0	0	0	1	0	1	0	0	1	0	0	0	88
5800	121	1	78	2	4	4	5	3	0	7	4	2	2	88	1	0	0	0	0	0	1	0	0	0	0	0	0	0	1	0	0	1	0	1	0	0	0	0	0	1	1	0	1	0	0	0	1	0	88
1000	117	2	78	2	1	4	4	5	0	5	9	2	4	88	1	0	0	0	0	0	0	0	0	0	0	0	0	0	0	0	0	0	0	0	0	0	0	1	0	0	0	0	0	0	0	0	0	0	88
16100	121	1	78	2	9	4	4	5	0	2	0	2	4	88	1	0	0	0	0	0	0	0	0	0	0	0	0	0	0	0	0	0	0	1	0	0	0	0	0	1	0	0	0	0	0	0	0	0	88
6700	050	1	78	2	1	4	4	3	0	6	0	2	3	88	0	0	0	0	0	0	0	0	0	0	0	0	0	0	0	0	0	0	0	0	0	0	0	1	0	0	0	0	0	0	0	0	1	0	88
4300	019	1	78	2	1	4	13	5	0	10	0	2	1	88	1	0	0	0	0	0	0	0	0	0	0	0	0	0	1	0	0	0	0	1	0	0	0	0	0	1	0	0	1	0	0	0	0	0	88
16600	051	1	78	2	1	4	4	4	0	2	0	2	1	88	1	0	0	0	0	0	0	0	0	0	0	0	0	0	1	0	0	0	0	1	0	0	0	0	0	1	0	0	1	0	0	0	0	0	88
500	104	1	78	2	2	5	6	5	9	3	0	2	1	88	0	1	0	0	0	0	0	0	0	0	0	0	0	0	0	0	0	0	0	1	0	0	0	0	0	1	0	0	0	0	0	0	0	0	88
19200	010	1	78	2	2	2	13	1	9	6	1	4	1	88	1	0	0	0	0	0	0	0	0	0	0	0	0	0	0	0	0	0	0	0	0	0	0	1	0	0	0	0	0	0	0	0	0	0	88
15400	050	1	78	2	1	1	10	1	1	8	0	4	5	Friend	0	0	1	0	0	0	0	0	0	0	0	0	0	0	0	0	0	0	0	1	1	0	1	0	0	1	0	0	0	0	0	0	1	1	Parkinsons Disease
4402	037	2	78	2	2	7	13	4	0	7	0	2	1	88	0	0	0	0	0	1	0	0	0	0	0	0	0	0	0	0	0	0	0	0	0	0	0	1	0	0	0	0	0	0	0	0	0	0	88
7300	092	1	78	2	2	4	6	3	0	6	0	2	2	88	0	0	1	0	0	0	0	0	0	0	0	0	0	0	1	0	0	0	0	0	0	0	1	0	0	0	0	0	1	0	0	0	0	1	Gall bladder stone
7000	074	2	78	2	2	1	1	1	0	3	0	2	4	88	1	0	0	0	0	0	0	0	0	0	0	0	0	0	0	0	0	0	1	0	0	0	0	0	0	0	0	0	0	0	0	1	0	0	88
4302	214	1	78	2	1	1	2	3	0	9	0	2	3	88	0	0	0	0	0	0	0	0	0	0	0	0	0	0	0	0	0	0	0	0	0	0	0	0	0	0	0	0	0	0	0	0	0	0	88
4302	172	1	78	2	3	7	3	3	0	6	2	3	5	Companion	1	0	0	0	0	0	0	0	0	0	0	0	0	0	0	0	0	0	0	0	0	0	0	0	0	1	0	0	1	0	1	1	0	0	88
19400	074	2	78	2	1	1	2	5	0	99	2	3	1	88	1	0	0	0	0	0	0	0	0	0	0	0	0	0	0	0	0	0	0	1	0	0	0	0	0	1	0	0	0	0	0	0	0	0	88
6001	036	1	78	2	1	1	1	6	0	9	0	2	1	88	0	0	0	0	0	0	0	0	0	0	0	1	0	0	0	0	0	0	0	0	0	0	0	0	0	0	0	0	0	0	0	0	0	1	Cancer medication
6000	078	2	78	2	1	1	13	5	0	10	0	2	5	Mother	1	0	0	0	0	0	0	0	0	1	0	0	0	0	1	0	0	1	0	1	0	0	0	0	0	1	1	0	1	0	1	0	1	0	88
19400	074	2	78	2	1	1	2	4	0	10	4	3	4	88	0	0	1	0	0	0	0	0	0	1	0	0	0	0	1	0	0	0	0	0	0	0	0	0	0	0	0	0	1	0	0	0	0	1	Poor circulation
5600	097	1	78	2	1	1	10	3	0	4	0	2	2	88	0	0	1	0	0	0	0	0	0	0	0	0	0	0	1	0	0	0	1	1	0	0	0	0	0	1	1	0	1	1	0	1	0	0	88
19100	011	2	78	2	1	4	5	3	0	7	0	2	5	Brother niece and relatives	0	0	0	0	0	0	0	0	0	0	0	0	0	0	1	0	0	1	1	0	0	0	0	0	0	1	0	0	1	0	1	1	0	0	88
5100	027	2	78	2	1	7	13	5	0	8	0	2	1	88	0	0	1	0	0	0	0	0	0	1	0	0	0	0	0	0	0	0	0	1	0	0	0	0	0	0	0	0	0	0	0	0	1	0	88
25900	033	1	78	2	1	1	1	3	0	7	0	2	2	88	1	0	0	0	0	0	0	0	0	0	0	0	0	0	0	0	0	0	0	1	0	0	0	0	0	1	0	0	0	0	0	0	0	0	88
500	032	2	78	2	3	1	11	5	0	7	0	4	5	Sister and nephews	1	0	0	0	0	0	0	0	0	0	0	0	0	1	1	0	0	0	0	1	0	0	0	0	0	1	1	0	1	1	0	0	1	0	88
16400	036	1	78	2	1	4	4	3	0	9	0	2	4	88	1	0	0	0	0	0	0	0	0	1	0	0	0	0	0	0	0	0	0	1	0	0	1	0	0	1	0	0	0	0	1	0	0	1	Cirlculation medication
26001	065	1	78	2	1	4	5	3	0	3	0	2	3	88	0	0	1	0	0	0	0	0	0	0	1	0	0	0	0	0	0	0	0	1	0	0	0	0	0	1	0	0	0	0	1	0	1	1	Asthma medication
4700	016	2	78	2	2	4	11	5	0	5	0	4	4	88	0	0	0	0	0	0	1	0	0	1	0	0	0	0	1	0	0	0	0	1	0	0	0	0	0	1	1	0	1	0	0	0	1	0	88
7002	015	1	78	2	3	1	2	3	0	7	0	2	2	88	0	0	0	0	0	0	0	0	0	0	0	0	0	0	0	0	0	0	0	0	0	0	0	1	0	0	0	0	0	0	0	0	1	0	88
3701	083	1	78	2	1	4	4	3	0	8	0	2	5	Spouse and children and family	0	0	0	0	0	0	0	0	0	1	0	0	0	0	0	0	0	0	1	1	0	0	0	0	0	1	1	0	0	0	1	1	1	0	88
10500	100	1	78	2	1	1	1	3	0	1	0	2	5	Grandchild and spouse	1	0	0	0	0	0	0	0	0	0	0	1	0	0	0	0	0	0	0	0	0	0	0	0	0	0	0	0	0	0	0	0	0	1	Prostate medication
29400	132	2	78	2	3	5	2	5	0	2	0	2	1	88	0	0	0	0	0	0	0	0	0	0	0	0	0	0	0	0	0	0	0	0	0	0	1	1	0	0	0	0	0	0	0	0	0	1	Thyroid medication
3400	10	2	78	2	1	4	4	3	0	5	0	2	2	88	0	0	1	0	0	0	0	0	0	1	0	0	0	0	0	0	0	0	0	0	0	0	0	0	0	0	0	0	0	0	1	0	0	0	88
2400	075	1	78	2	1	4	4	5	0	1	0	2	4	88	1	1	0	0	0	0	0	0	0	0	0	0	0	0	0	0	0	0	0	0	0	0	1	0	0	0	0	0	0	0	0	0	0	1	Eye drops
32000	113	1	78	2	1	7	13	3	0	9	0	2	3	88	1	0	0	0	0	0	0	0	0	1	0	0	0	0	0	0	0	0	0	0	0	0	0	0	0	0	0	0	0	0	1	0	0	0	88
10500	159	1	78	2	1	4	4	3	0	2	0	2	3	88	1	0	0	0	0	1	0	0	0	1	0	0	0	0	0	0	0	0	0	0	0	0	0	0	0	0	0	0	0	0	1	0	0	0	88
28900	027	1	78	2	1	1	1	1	0	7	0	4	5	Friend	0	0	0	0	0	0	0	0	0	0	0	0	0	0	0	0	0	0	0	1	0	0	0	0	0	1	0	0	0	0	0	0	0	0	88
15500	007	1	78	2	3	4	13	3	0	7	0	2	3	88	1	0	0	0	0	0	0	0	0	0	0	0	0	0	0	0	0	1	0	0	0	0	0	0	0	0	0	0	0	0	0	0	0	1	Heart medication
32000	122	1	78	2	2	3	13	1	0	7	0	1	5	Brother	0	0	0	0	0	0	1	0	0	0	0	0	0	0	0	0	0	0	1	1	0	0	0	0	0	1	0	0	0	0	0	1	0	0	88
26400	029	2	78	2	1	1	13	5	0	10	0	1	4	88	0	0	1	0	0	0	0	0	0	0	0	0	0	0	0	0	0	0	0	0	0	0	0	1	0	0	0	0	0	0	0	0	0	1	Eye drops
15500	067	1	78	2	2	1	13	5	0	9	0	2	1	88	0	0	0	0	0	0	1	0	0	0	0	0	0	0	0	0	0	0	0	0	0	0	0	1	0	0	0	0	0	0	0	0	0	0	88
1800	093	2	78	2	1	1	2	5	0	8	0	2	5	Child and grandchildren	0	0	0	0	0	0	0	0	0	1	0	0	0	0	0	0	0	0	0	1	0	0	0	0	0	1	0	0	0	0	0	0	0	0	88
8600	086	2	78	2	1	1	10	5	0	10	0	2	5	Grandchildren	0	0	1	0	0	0	0	0	0	1	0	0	0	0	1	0	0	0	0	1	0	0	0	0	0	1	1	0	1	0	0	0	0	0	88
8300	063	1	78	2	1	1	2	5	9	9	0	9	1	88	0	0	0	0	0	0	0	0	0	0	0	0	0	0	0	0	0	0	0	0	0	0	0	0	0	0	0	0	0	0	0	0	0	0	88
9200	098	1	78	2	2	4	4	2	0	10	0	1	5	Brother	1	0	0	0	0	0	0	0	0	0	0	0	0	0	1	0	0	0	0	1	0	0	0	0	0	1	0	0	1	0	0	0	0	0	88
19400	021	2	78	2	1	1	14	5	0	7	0	2	5	Grandchildren	1	0	0	0	0	0	0	0	0	0	0	0	0	0	0	0	0	0	0	0	0	0	0	0	0	0	0	0	0	0	0	0	0	0	88
7400	041	1	78	2	2	1	17	5	0	9	0	9	1	88	0	0	0	0	0	0	0	0	0	0	0	0	0	0	0	0	0	0	0	0	0	0	0	1	0	0	0	0	0	0	0	0	1	0	88
5100	015	1	78	2	3	7	7	5	0	7	4	3	1	88	0	0	0	0	0	0	0	0	0	0	0	0	0	0	0	0	0	0	0	0	0	0	0	1	0	0	0	0	0	0	0	0	0	0	88
13700	060	2	78	2	1	4	4	5	0	1	0	2	4	88	0	1	0	0	0	0	0	0	0	0	0	0	0	0	0	0	0	0	0	0	0	0	0	1	0	0	0	0	0	0	0	0	1	0	88
13000	123	2	78	2	0	4	4	3	0	5	0	2	3	88	0	0	0	0	0	0	0	0	0	1	0	0	0	0	0	0	0	0	0	0	0	0	0	0	0	0	0	0	0	0	1	0	0	0	88
3701	123	2	78	2	1	4	4	5	0	2	0	2	5	Granddaughter	1	0	0	0	0	0	0	0	0	1	0	0	0	0	0	0	0	0	1	1	0	0	0	0	0	1	1	0	0	0	1	1	0	0	88
6000	084	2	78	2	1	7	1	5	0	10	0	1	5	Brother	1	0	0	0	0	0	0	0	0	0	0	0	0	0	0	0	0	0	0	1	0	0	0	0	0	1	0	0	0	0	0	0	1	0	88
14900	008	1	78	2	1	1	11	3	0	2	0	2	5	Spouse and grandchildren	0	0	0	0	0	0	0	0	0	1	0	0	0	0	0	0	0	0	0	0	0	0	0	0	0	0	0	0	0	0	1	0	0	0	88
21200	097	1	78	2	1	1	2	4	0	8	0	2	1	88	0	0	0	0	0	0	0	0	0	0	0	0	0	0	0	0	0	0	0	0	0	0	0	1	0	0	0	0	0	0	0	0	0	0	88
9200	053	1	78	2	1	5	1	3	1	3	0	2	3	88	1	0	0	0	0	0	0	0	0	0	0	0	0	0	1	0	0	0	0	0	0	0	0	0	0	0	1	0	1	0	0	0	0	0	88
700	067	1	78	2	1	7	13	5	0	8	0	2	1	88	1	0	0	0	0	0	0	0	0	1	0	0	0	0	0	0	0	0	0	0	0	0	0	0	0	0	0	0	0	0	1	0	0	0	88
3200	088	1	78	2	1	4	5	3	0	3	0	2	2	88	0	0	0	0	0	0	0	0	0	1	0	0	0	0	1	0	0	0	1	1	0	0	0	0	0	1	0	0	1	0	1	1	1	0	88
5100	007	2	78	2	1	7	13	5	0	8	0	2	5	Grandchild	1	0	0	0	0	0	0	0	0	0	0	0	0	0	0	0	0	0	0	0	0	0	0	1	0	0	0	0	0	0	0	0	1	0	88
3602	023	1	78	2	2	4	5	5	0	3	0	2	1	88	0	0	0	0	0	0	0	0	0	1	0	0	0	0	0	0	0	0	0	0	0	0	0	0	0	0	0	0	0	0	1	0	0	0	88
3602	003	1	78	2	2	4	5	5	0	3	0	2	1	88	0	0	0	0	0	0	0	0	0	1	0	0	0	0	0	0	0	0	0	0	0	0	0	1	0	0	0	0	0	0	1	0	0	0	88
7400	012	2	78	2	1	1	2	4	0	10	9	4	1	88	0	0	0	0	0	0	0	0	0	0	0	0	0	0	0	0	0	0	0	0	0	0	0	1	0	0	0	0	0	0	0	0	1	0	88
10500	052	2	78	2	1	4	11	5	0	5	0	2	4	88	1	0	0	0	0	0	0	0	0	1	0	0	0	0	0	0	0	0	1	0	0	0	0	0	0	0	0	0	0	0	1	1	1	0	88
8000	109	2	78	2	2	4	4	1	0	3	0	2	1	88	0	0	0	0	0	0	0	0	0	0	0	0	0	0	1	0	0	0	0	1	0	0	0	0	0	0	1	0	1	0	0	0	0	0	88
8000	149	2	78	2	1	1	13	3	0	5	0	2	3	88	0	1	0	0	0	0	0	0	0	0	0	0	0	0	1	0	0	0	0	0	0	0	0	0	0	1	0	0	0	0	0	0	0	0	88
7500	020	1	78	2	1	7	13	3	0	7	0	2	3	88	1	0	0	0	0	0	0	0	0	1	0	0	0	0	0	0	0	0	0	1	0	0	0	0	0	1	0	0	0	0	0	0	1	0	88
7500	102	2	78	2	1	7	1	5	0	5	0	1	5	Child and grandchild	1	0	0	0	0	0	0	0	0	0	0	0	0	0	0	0	0	0	0	1	0	0	0	0	0	1	0	0	0	0	0	0	0	0	88
13100	059	1	78	2	2	7	5	3	1	9	0	9	2	88	0	0	0	0	0	0	0	0	0	0	0	0	0	0	0	0	0	0	0	1	0	0	0	0	0	1	0	0	0	0	0	0	1	0	88
2200	87	1	78	2	2	4	5	5	0	3	0	2	4	88	0	0	0	0	0	0	0	0	0	0	0	0	0	0	0	0	0	0	0	0	0	0	0	0	0	0	0	0	0	0	0	0	1	0	88
2200	17	2	78	2	1	1	14	5	0	5	0	2	5	Children and grandchildren	0	0	0	0	0	0	0	0	0	0	0	0	0	0	0	0	0	0	0	1	0	0	0	0	0	1	0	0	0	0	0	0	0	0	88
33602	127	1	79	2	1	4	4	3	0	10	9	2	2	88	1	0	0	0	0	0	0	0	0	1	0	0	0	0	1	0	0	0	1	1	0	0	0	0	0	1	0	0	1	1	1	1	0	0	88
24602	015	1	79	2	1	4	4	5	0	10	0	1	4	88	1	0	0	0	0	0	0	0	0	0	0	0	0	0	0	0	0	0	0	0	0	0	0	1	0	0	0	0	0	0	0	0	0	0	88
4402	014	2	79	2	9	1	2	5	0	99	0	2	3	88	1	0	0	0	0	0	0	0	1	1	0	0	0	0	1	0	0	0	0	0	0	0	0	0	1	1	0	0	1	1	0	0	0	0	88
13200	059	2	79	2	9	1	13	5	0	10	0	1	4	88	0	0	0	0	0	0	0	0	0	0	0	0	0	0	1	0	0	0	0	1	0	0	0	0	0	1	0	0	1	0	0	0	0	0	88
24602	039	1	79	2	1	4	4	3	0	9	0	1	3	88	1	0	0	0	0	0	0	0	0	0	1	0	0	0	1	0	0	1	1	1	0	0	0	0	0	1	0	1	1	0	0	1	0	0	88
4301	184	1	79	2	0	4	11	3	0	10	0	2	2	88	0	0	0	0	0	0	0	0	0	0	1	0	0	0	1	0	0	1	1	1	0	0	0	0	0	1	1	0	1	0	1	1	0	1	Heart medication
16600	047	2	79	2	1	4	4	4	0	5	0	2	1	88	1	0	0	0	0	0	0	0	0	0	0	0	0	0	0	0	0	0	0	1	0	0	0	0	0	1	0	0	0	0	0	0	0	0	88
1900	029	2	79	2	1	4	4	5	0	2	0	2	4	88	0	0	0	0	0	0	0	0	0	1	0	0	0	0	1	0	0	0	0	1	0	0	0	0	0	1	1	0	1	1	1	0	1	0	88
16100	119	2	79	2	1	4	4	5	0	5	0	2	4	88	1	0	0	0	0	0	0	0	0	0	0	0	0	0	1	0	0	0	0	1	0	0	0	0	0	1	0	0	1	0	0	0	0	0	88
28100	033	1	79	2	0	2	13	5	0	1	0	2	4	88	1	0	0	0	0	0	0	0	0	1	0	0	0	0	0	0	0	0	0	1	0	0	0	0	0	1	0	0	0	0	1	0	1	0	88
4300	082	2	79	3	1	7	13	5	0	5	0	2	4	88	0	0	0	0	0	0	1	0	0	0	0	0	0	0	1	0	0	0	0	0	0	0	0	0	0	0	0	0	0	1	0	0	0	0	88
1000	121	1	79	2	3	4	5	3	0	1	9	2	2	88	1	0	0	0	0	0	0	0	0	0	0	0	0	0	1	0	0	0	0	1	0	0	0	0	0	1	0	0	1	0	0	0	0	0	88
3500	063	1	79	2	1	7	13	3	0	8	0	2	3	88	0	0	0	0	0	0	0	0	0	0	0	0	0	0	0	0	0	0	0	0	0	0	0	1	0	0	0	0	0	0	0	0	0	0	88
28100	121	2	79	2	9	1	1	3	9	4	0	2	2	88	0	0	0	0	0	0	0	0	0	0	0	0	0	0	0	0	0	0	0	1	0	0	0	0	0	1	0	0	0	0	0	0	0	0	88
9001	083	1	79	2	2	1	13	3	0	7	0	2	3	88	1	0	0	0	0	0	0	0	0	0	0	0	0	0	0	0	0	0	0	1	0	0	0	0	0	1	1	0	0	0	0	0	0	0	88
4001	100	2	79	2	1	1	2	5	0	5	0	2	3	88	0	0	0	0	0	0	0	0	0	1	0	0	0	0	0	0	0	0	0	1	0	0	0	0	0	1	0	0	0	0	0	0	0	0	88
4001	153	2	79	2	1	7	13	5	0	8	0	2	4	88	1	0	0	0	0	0	0	0	0	1	0	0	0	0	0	0	0	0	1	1	0	0	0	0	0	1	0	0	0	0	0	1	0	0	88
8000	083	1	79	2	1	11	4	3	0	7	0	2	2	88	0	0	0	0	0	0	0	0	0	0	0	0	0	0	0	0	0	0	0	0	0	0	0	1	0	0	0	0	0	0	0	0	0	0	88
5500	065	1	79	2	1	4	4	3	0	8	0	2	3	88	0	0	0	0	0	0	0	0	0	1	0	0	0	0	1	0	0	1	0	1	0	0	0	0	0	1	0	0	1	0	0	0	0	0	88
18300	135	2	79	2	1	7	13	4	0	2	0	2	5	Children and grandchildren	1	0	0	0	0	0	0	0	0	0	0	0	0	0	0	0	0	0	0	1	0	0	0	0	0	1	0	0	0	0	0	0	1	0	88
25900	105	1	79	2	3	1	1	2	0	7	0	2	1	88	1	0	0	0	0	0	0	0	0	0	0	1	0	0	1	0	0	0	0	0	0	0	0	0	0	0	0	0	1	0	0	0	0	1	Cancer medication
26400	035	2	79	2	1	7	10	4	0	10	0	4	4	88	1	0	1	0	0	0	0	0	0	1	0	0	0	0	0	0	0	0	0	0	0	0	0	0	0	0	0	0	0	0	1	0	0	0	88
1900	090	2	79	2	1	1	10	4	0	99	0	2	4	88	1	0	0	0	0	0	0	0	0	1	0	0	0	0	0	0	0	0	0	1	0	0	0	0	0	1	0	0	0	0	0	0	0	1	Arthritis medication
700	016	1	79	2	2	4	5	5	0	4	0	2	1	88	1	0	0	0	0	0	0	0	0	1	0	0	0	0	1	0	0	0	0	1	0	0	0	0	0	1	1	0	1	0	1	0	1	0	88
16400	035	2	79	2	3	7	13	5	0	7	0	2	5	Grandchildren	1	0	0	0	0	0	0	0	0	0	0	0	0	0	0	0	0	0	0	1	0	0	0	0	0	1	0	0	0	0	0	0	1	0	88
20400	135	2	79	2	1	1	1	5	0	10	2	2	1	88	1	0	0	0	0	0	0	0	0	1	0	0	0	0	0	0	0	0	0	1	0	0	1	0	0	1	0	0	0	0	1	0	0	1	Low blood count
6000	060	1	79	2	3	1	13	5	0	7	0	2	4	88	0	0	0	0	0	0	0	0	0	0	0	0	0	0	0	0	0	0	0	0	0	0	0	0	0	0	0	0	1	0	0	0	1	0	88
21700	158	2	79	2	1	4	4	5	0	5	0	1	1	88	1	0	1	0	0	0	0	0	0	0	0	0	0	0	0	0	0	0	0	0	0	0	0	1	0	0	1	1	0	0	0	1	1	0	88
16800	055	2	79	2	2	4	4	3	0	5	0	2	2	88	0	0	0	0	0	0	0	0	0	1	0	0	0	0	0	0	0	0	0	0	0	0	0	0	0	0	0	0	0	0	1	0	0	0	88
8000	083	1	79	2	2	1	13	3	0	7	0	2	5	Grandchildren and daughter in law	0	0	1	1	0	0	0	0	0	1	0	0	0	0	0	0	0	0	1	1	0	0	0	0	0	0	0	0	0	0	0	1	0	1	Hypertension and sinositis
1900	061	1	79	2	2	4	13	3	0	7	0	2	3	88	0	0	0	0	0	0	0	0	0	0	0	0	0	0	0	0	0	0	0	0	0	0	0	1	0	0	0	0	0	0	0	0	1	0	88
4001	118	2	79	2	1	1	13	5	0	10	0	2	5	Son and his spouse	0	0	1	0	0	0	0	0	0	1	0	0	0	0	0	0	0	0	0	1	0	0	0	0	0	1	0	0	0	0	0	0	0	0	88
3400	62	1	79	2	9	4	4	3	0	2	0	1	3	88	0	1	0	0	0	0	0	0	0	1	0	0	0	0	0	0	0	0	0	0	0	0	0	0	0	0	0	0	0	0	0	0	1	0	88
15400	068	1	79	2	0	7	13	3	0	9	0	2	2	88	1	0	0	0	0	0	0	0	0	1	0	0	0	0	0	0	0	0	0	0	0	0	0	0	0	0	0	0	0	0	1	0	1	0	88
4402	023	1	79	2	3	4	11	3	0	7	0	2	3	88	0	0	0	0	0	0	0	0	0	0	0	0	0	0	0	0	0	0	0	0	0	0	0	1	0	0	0	0	0	0	0	0	0	0	88
6000	086	1	79	2	1	1	2	5	0	9	0	2	4	88	0	0	0	0	0	0	0	0	0	1	0	0	0	0	0	0	0	0	0	0	0	0	0	0	0	0	0	0	0	0	1	0	1	0	88
3400	018	2	79	2	1	1	1	4	0	10	0	9	1	88	0	0	0	0	0	0	0	0	0	0	0	0	0	0	0	0	0	0	0	0	0	0	0	1	0	0	0	0	0	0	0	0	0	0	88
13700	063	1	79	2	1	4	4	3	0	1	0	2	2	88	0	0	0	0	0	0	0	0	0	0	0	0	0	0	0	0	0	0	0	0	0	0	0	0	0	0	0	0	0	0	0	0	1	0	88
3701	052	1	79	2	1	5	16	5	0	2	0	2	4	88	0	0	0	0	0	0	0	0	0	0	0	0	0	0	0	0	0	0	0	0	0	0	0	0	0	0	0	0	0	0	0	0	0	0	88
6000	071	1	79	2	1	1	13	3	0	7	0	2	3	88	0	0	0	0	0	0	0	0	0	0	0	0	0	0	0	0	0	0	0	0	0	0	0	1	0	0	0	0	0	0	0	0	0	0	88
14900	040	1	79	2	1	1	1	3	0	2	0	1	2	88	0	0	0	0	0	0	0	0	0	1	0	0	0	0	0	0	0	0	0	0	0	0	0	0	0	0	0	0	0	0	1	0	0	0	88
20400	088	1	79	2	1	1	10	3	0	9	0	2	2	88	1	0	0	0	0	0	0	0	0	1	0	0	0	0	1	0	0	0	0	0	0	0	0	0	0	0	0	0	1	0	1	0	1	0	88
8000	062	2	79	2	0	1	13	5	0	1	0	2	4	88	0	0	0	0	0	0	0	0	0	0	0	0	0	0	0	0	0	0	0	1	0	0	0	0	0	1	0	0	0	0	0	0	0	0	88
8000	063	1	79	2	1	4	4	3	0	3	0	2	2	88	0	0	0	0	0	0	0	0	0	0	0	0	0	0	1	0	0	0	0	1	0	0	0	0	0	1	0	0	1	0	0	0	0	0	88
8000	083	2	79	2	0	4	4	3	0	5	0	2	2	88	0	0	0	0	0	0	0	0	0	1	0	0	0	0	1	0	0	0	1	1	0	0	0	0	0	1	0	0	1	0	1	0	0	0	88
2400	128	1	79	2	1	5	1	4	0	9	0	2	1	88	1	0	0	0	0	0	0	0	0	0	0	0	0	0	0	0	0	0	0	0	0	0	0	1	0	0	0	0	0	0	0	0	1	0	88
3602	036	1	79	2	2	4	5	5	0	7	0	2	1	88	0	0	0	0	0	0	0	0	0	0	0	0	0	0	0	0	0	0	0	0	0	0	0	1	0	0	0	0	0	0	0	0	0	0	88
5800	200	2	79	2	1	4	4	5	0	10	0	1	4	88	0	0	1	0	0	0	0	0	0	0	0	0	0	0	1	0	0	0	0	1	0	0	0	0	0	1	1	0	1	0	0	0	1	0	88
29400	070	2	79	2	1	7	13	5	0	5	0	2	4	88	1	0	0	0	0	0	0	0	0	1	0	0	0	0	0	0	0	0	0	1	0	0	0	1	0	1	0	0	0	0	1	0	1	0	88
13600	041	1	79	2	0	4	13	5	9	10	0	1	4	88	1	0	1	0	0	0	1	0	0	0	0	0	0	0	1	0	0	0	0	1	0	0	1	0	0	1	0	0	1	0	0	0	0	1	Kidney and heart
31900	002	1	79	2	1	1	1	3	0	9	2	3	2	88	0	0	0	0	0	0	0	0	0	0	0	0	0	0	0	0	0	0	0	0	0	0	0	1	0	0	0	0	0	0	0	0	1	0	88
4001	76	1	79	2	4	1	13	3	0	9	0	2	3	88	1	0	0	0	0	0	0	0	0	1	0	0	0	0	0	0	0	0	0	0	0	0	0	0	0	0	0	0	0	0	0	0	1	0	88
3200	104	2	79	2	1	4	4	3	0	5	0	2	3	88	0	0	0	0	0	0	0	0	0	0	0	0	0	0	0	0	0	0	0	0	0	0	0	0	0	0	0	0	0	0	0	0	0	0	88
8000	160	1	79	2	1	4	4	5	0	1	0	2	1	88	0	0	0	0	0	0	0	0	0	0	0	0	0	0	1	0	0	0	0	1	0	0	0	0	0	1	0	0	1	0	0	0	0	0	88
6001	062	1	79	2	2	1	2	5	0	9	0	2	1	88	0	0	0	0	0	0	0	0	0	1	0	0	0	0	0	0	0	0	0	0	0	0	0	0	0	0	0	0	0	0	0	0	0	0	88
19400	061	2	79	2	3	5	13	6	0	5	0	2	4	88	0	0	0	0	0	0	0	0	0	0	0	0	0	0	0	0	0	0	0	0	0	0	1	0	0	0	0	0	0	0	0	0	1	1	Allergy
19400	069	1	79	2	1	4	4	5	0	9	0	2	1	88	0	0	0	0	0	0	0	0	0	0	0	0	0	0	0	0	0	0	0	0	0	0	0	1	0	0	0	0	0	0	0	0	1	1	Ginko
18000	067	2	80	3	1	5	1	5	0	5	0	2	4	88	0	0	1	0	0	0	0	0	0	0	0	0	0	0	0	0	0	0	0	1	0	0	0	0	0	1	0	0	0	0	0	0	0	0	88
1900	130	2	80	3	1	1	10	5	0	99	0	4	4	88	0	0	0	0	0	0	0	0	0	1	1	0	0	0	0	0	0	0	0	0	0	0	0	0	0	0	0	0	0	0	0	0	0	1	Asthma medication
27300	098	2	80	3	1	1	13	2	0	8	0	1	1	88	1	0	0	0	0	0	0	0	0	0	0	0	1	1	1	0	0	0	0	0	0	0	1	0	1	0	0	0	1	0	1	0	0	1	Osteoporosis medication
8300	048	1	80	3	1	1	2	5	0	1	0	2	1	88	0	0	0	0	0	0	0	0	0	0	0	0	0	0	0	0	0	0	0	0	0	0	0	1	0	0	0	0	0	0	0	0	0	0	88
25400	174	1	80	3	1	5	13	3	0	9	0	1	2	88	0	0	0	0	0	0	0	0	0	0	0	0	0	0	0	0	0	0	0	0	0	0	0	1	0	0	0	0	0	0	0	0	1	0	88
4301	115	2	80	3	1	1	13	5	0	10	0	1	5	Grandchildren son and daughter in law	1	0	1	0	0	0	0	0	1	1	0	0	0	1	0	0	0	0	1	1	1	1	0	0	0	1	0	0	0	0	1	1	0	1	Alzheimers and Parkinsons
13200	123	2	80	3	1	7	13	5	0	5	0	1	4	88	0	0	0	0	0	0	0	0	0	0	0	0	0	0	0	0	0	0	0	1	0	0	0	0	0	1	0	0	0	0	0	0	0	0	88
2300	040	1	80	3	1	1	14	3	0	10	0	2	2	88	1	0	0	0	0	1	0	0	0	1	0	0	0	0	0	0	0	0	1	0	0	0	0	0	0	0	0	0	0	0	1	1	0	0	88
8300	084	1	80	3	1	1	13	4	0	9	0	2	1	88	1	0	0	0	0	0	0	0	0	0	0	0	0	0	1	0	0	0	0	0	1	0	0	0	0	0	0	0	0	0	0	0	0	1	Parkinsons Disease
13100	149	1	80	3	1	4	11	3	0	2	0	2	2	88	0	1	1	0	0	0	0	0	0	1	0	0	0	0	0	0	0	0	1	1	0	1	0	0	0	1	1	0	0	0	0	1	1	0	88
1900	046	2	80	3	1	1	13	4	0	1	0	1	5	Daughter	1	0	0	0	0	0	0	0	0	0	0	0	0	0	1	0	0	0	0	1	0	0	0	0	0	1	1	0	1	0	0	0	1	0	88
18000	088	1	80	3	4	1	13	3	0	7	0	2	3	88	0	0	0	0	0	0	0	0	0	0	0	0	0	0	0	0	0	0	0	0	0	0	0	1	0	0	0	0	0	0	0	0	0	0	88
3500	023	1	80	3	1	7	1	3	0	8	0	2	3	88	0	0	0	0	0	0	0	0	0	1	0	0	0	0	0	0	0	0	1	0	0	0	0	0	0	0	0	0	0	0	1	1	0	0	88
1000	067	2	80	3	1	1	1	3	0	5	0	2	3	88	1	0	0	0	0	0	0	0	0	0	0	0	0	0	1	0	0	0	0	0	0	0	0	0	0	0	0	0	1	0	0	0	0	0	88
3601	179	2	80	3	2	5	13	5	0	10	0	2	5	Grand and great grandchildren	1	0	0	0	0	0	0	0	0	0	0	0	0	0	1	0	0	0	0	0	0	0	0	0	0	0	0	0	1	0	0	0	0	0	88
27300	116	2	80	3	9	4	11	5	0	5	0	1	4	88	0	0	0	0	0	0	0	0	0	1	0	0	0	0	0	0	0	0	0	0	0	0	0	0	0	0	0	0	0	0	1	0	0	0	88
11000	19	2	80	3	1	1	3	4	0	5	0	2	4	88	0	0	1	0	0	0	0	0	0	0	0	0	0	0	0	0	0	0	0	1	0	0	0	0	0	1	1	0	0	0	1	0	0	1	Heart medication
7300	030	2	80	3	1	1	13	3	0	10	0	4	2	88	0	0	1	0	0	0	0	0	0	1	0	0	0	0	1	0	0	0	1	1	0	0	1	0	0	1	1	0	1	0	0	1	1	0	Eye drops for cataract
19400	022	2	80	3	1	1	13	5	0	8	0	9	4	88	1	0	0	0	0	0	0	0	0	1	0	0	0	0	0	0	0	0	0	1	0	0	0	0	0	1	0	0	0	0	1	0	0	0	88
25900	093	2	80	3	3	1	17	5	0	7	0	2	1	88	0	1	0	0	0	0	0	0	0	0	0	0	0	0	0	0	0	0	0	0	0	0	0	0	0	0	0	0	0	0	0	0	0	0	88
26300	039	2	80	3	1	1	10	5	0	9	0	2	5	Grandchildren	1	1	0	0	0	0	1	0	0	1	0	0	0	0	1	0	0	0	0	1	0	0	0	0	0	1	0	0	1	0	0	0	0	1	Glaucoma medication
18000	032	1	80	3	2	1	13	3	0	8	0	2	2	88	0	0	0	0	0	0	0	0	0	1	0	0	0	0	0	0	0	0	0	0	0	0	0	0	0	1	1	0	1	0	1	0	0	1	Arthritis
5500	01	1	80	3	1	1	13	3	0	9	1	2	3	88	0	0	0	0	0	0	0	0	0	0	0	0	0	0	0	0	0	1	0	0	0	0	0	0	0	0	0	0	0	0	0	0	0	1	Heart medication
7500	011	2	80	3	1	7	13	5	0	10	0	2	9	88	1	0	0	0	0	0	0	0	0	1	0	0	0	0	1	0	0	0	1	0	0	0	0	0	0	0	0	0	1	0	0	1	0	0	88
29400	026	2	80	3	1	7	13	5	0	1	0	1	4	88	1	0	0	0	0	1	0	0	0	1	0	0	0	0	0	0	0	0	0	0	0	0	0	0	0	1	0	0	0	0	1	0	0	0	88
21000	024	1	80	3	1	1	10	3	0	9	4	3	5	Spouse children and grandchildren	1	0	1	0	0	0	0	0	0	1	0	0	0	0	0	0	0	1	1	0	0	0	0	0	0	0	1	0	0	0	0	0	0	1	Heart medication
1900	057	1	80	3	1	1	7	3	0	9	0	2	2	88	1	0	1	0	0	0	0	0	0	0	0	0	0	0	1	0	0	0	1	1	0	0	0	0	0	1	1	0	1	1	0	0	0	0	88
7300	154	1	80	3	1	4	13	5	0	1	0	4	4	88	1	0	1	0	0	0	0	0	0	1	0	0	0	0	0	0	0	0	0	0	0	0	0	0	0	0	1	0	0	0	1	0	0	0	88
10500	054	2	80	3	1	4	4	5	0	5	0	2	1	88	1	0	0	0	0	0	0	0	0	0	0	0	0	0	1	0	0	0	1	0	0	0	0	0	0	0	0	0	1	0	0	1	1	0	88
26001	018	2	80	3	1	1	10	5	0	10	0	2	5	Grandchildren	0	0	1	0	0	0	0	0	0	0	0	0	0	0	0	0	0	1	0	1	0	0	0	0	0	1	1	0	0	0	0	0	1	0	88
31900	003	2	80	3	1	1	2	5	0	5	2	3	5	Grand and great grand children and children	0	0	0	0	0	0	0	0	0	0	0	0	0	0	0	0	0	0	0	0	0	0	0	1	0	0	0	0	0	0	0	0	0	1	Blood circulation
21700	026	1	80	3	4	4	11	3	0	9	0	2	5	Child and grandchildren	0	1	0	0	0	0	0	0	0	0	1	0	0	0	1	0	0	0	0	0	0	0	0	0	0	0	0	0	1	0	0	0	0	0	88
30502	51	2	80	3	1	1	1	5	0	10	0	2	4	88	0	0	1	0	0	0	0	0	0	0	0	0	0	0	0	0	0	0	0	1	0	0	0	0	0	1	0	0	0	0	0	0	0	0	88
19100	147	1	80	3	1	4	5	3	1	1	0	1	3	88	0	0	0	0	0	0	0	0	0	0	0	0	0	0	1	0	0	0	0	0	0	0	0	0	0	0	1	0	1	0	0	0	0	0	88
1900	024	2	80	3	2	7	6	5	0	5	0	2	4	88	0	0	0	0	0	0	0	0	0	0	0	0	0	0	0	0	0	0	0	0	0	0	0	1	0	0	0	0	0	0	0	0	1	0	88
3400	082	2	80	3	1	4	4	5	0	5	0	1	4	88	0	0	1	0	0	0	0	0	0	1	0	0	0	0	1	0	0	0	0	0	0	0	0	0	0	0	0	0	1	0	1	0	0	0	88
28900	017	2	80	3	1	7	13	5	0	9	0	2	1	88	0	0	0	0	0	0	0	0	0	0	0	0	0	0	0	0	0	0	0	0	0	0	0	1	0	0	0	0	0	0	0	0	1	0	88
28900	079	1	80	3	1	1	13	3	0	9	0	2	2	88	0	0	0	0	1	0	0	0	0	0	0	0	0	0	0	0	0	0	0	0	0	0	0	1	0	0	0	0	0	0	0	1	1	0	88
11000	100	2	80	3	1	4	4	5	0	5	0	2	4	88	1	0	1	0	0	0	0	0	0	0	0	0	0	0	0	0	0	0	0	1	0	0	0	0	0	1	1	0	0	0	1	0	0	0	88
21700	123	1	80	3	3	1	13	3	0	3	0	2	2	88	1	0	0	0	0	0	0	0	0	0	0	0	0	0	1	0	0	0	0	1	0	0	0	1	0	1	1	0	1	0	0	0	0	0	88
13600	013	1	80	3	1	1	13	3	9	10	0	2	2	88	0	0	0	0	0	0	1	0	0	0	0	0	0	0	0	0	0	0	0	0	0	0	0	1	0	0	0	0	0	0	0	0	0	0	Eyedrops
19200	012	2	80	3	2	2	13	4	0	4	4	4	5	Sister	1	0	0	0	0	0	0	0	0	0	0	0	0	0	0	0	0	0	0	0	0	0	0	1	0	0	0	0	0	0	0	0	0	0	88
500	045	1	80	3	2	1	13	3	0	7	4	4	2	88	1	0	0	0	0	0	0	0	0	0	0	0	0	0	0	0	0	0	0	0	0	0	0	1	0	0	0	0	0	0	1	0	1	0	88
22700	002	2	80	3	1	1	13	5	0	9	4	3	1	88	0	0	1	0	0	0	0	0	0	1	0	0	0	0	0	0	0	0	0	0	0	0	0	0	0	0	0	0	0	0	0	0	1	0	88
19700	090	2	80	3	1	4	11	5	0	7	0	1	4	88	0	0	0	0	0	1	0	0	0	0	0	0	0	0	0	0	0	0	0	0	0	0	0	0	0	1	0	0	0	0	0	0	0	0	88
25900	009	1	80	3	1	4	5	5	0	10	0	2	4	88	1	0	0	0	0	0	0	0	0	1	0	0	0	0	1	0	0	0	1	1	0	0	0	0	0	1	0	0	1	0	0	1	0	0	88
15500	045	1	80	3	1	7	10	3	0	9	0	2	3	88	0	0	0	0	0	0	0	0	0	0	0	0	0	0	0	0	0	0	0	0	0	0	0	1	0	0	0	0	0	0	0	0	1	0	88
30502	34	1	80	3	1	4	4	5	0	10	0	2	4	88	0	0	1	0	0	0	0	0	0	0	0	0	0	0	0	0	0	1	0	0	0	0	0	1	0	0	0	0	0	0	0	0	0	1	Heart medication
26300	042	1	80	3	1	1	13	3	0	9	0	9	5	Children and grandchildren	1	0	0	0	0	0	0	0	0	1	0	0	0	0	0	0	0	0	0	0	0	0	1	0	0	0	0	0	0	0	0	0	1	0	88
4402	008	2	80	3	1	1	2	4	0	7	0	2	1	88	0	0	0	0	0	0	0	0	0	0	0	0	0	0	0	0	0	0	0	0	0	0	0	1	0	0	0	0	0	0	0	0	1	0	88
6000	043	1	80	3	1	4	4	5	0	3	0	2	4	88	0	0	0	0	0	0	0	0	0	0	0	0	0	0	0	0	0	0	0	1	0	1	0	0	0	1	0	0	0	0	1	0	1	0	88
16800	130	2	80	3	1	5	2	5	0	2	0	2	5	Children and grandchildren	0	0	0	0	0	0	0	0	0	0	0	0	0	0	0	0	0	0	0	0	0	0	0	0	0	0	0	0	0	0	1	0	0	0	88
1900	135	1	80	3	1	1	13	4	0	9	0	2	4	88	0	0	0	0	0	0	0	0	0	1	0	0	0	0	1	1	1	1	1	0	0	0	1	0	0	0	0	0	1	0	0	0	0	1	Glaucoma medication
19700	035	2	80	3	1	5	13	5	0	10	0	9	4	88	0	0	1	0	0	0	0	0	0	0	0	0	0	0	1	0	0	0	0	0	0	0	0	0	0	0	0	0	1	0	0	0	0	0	88
19700	011	2	80	3	1	4	4	5	9	5	0	3	4	88	0	0	0	0	0	0	0	0	0	0	0	0	0	0	0	0	0	0	0	0	0	0	0	0	0	0	0	0	0	0	0	0	0	0	88
7300	134	1	80	3	1	7	5	4	0	1	0	4	4	88	0	0	0	0	0	0	0	0	0	0	0	0	0	0	0	0	0	0	0	0	0	0	0	1	0	0	0	0	0	0	0	0	1	0	88
20300	037	1	80	3	2	1	13	5	0	9	0	2	1	88	1	0	1	0	0	0	0	0	0	0	1	0	0	0	0	0	0	1	0	1	0	0	0	0	0	1	1	0	0	0	0	0	0	1	Asthma medication
3400	017	2	80	3	1	1	10	4	0	10	0	9	4	88	0	0	0	0	0	0	0	0	0	1	0	0	0	0	1	0	0	0	0	0	0	0	0	0	0	0	1	0	1	0	0	0	0	0	88
7400	040	2	80	3	2	1	13	5	0	5	0	9	4	88	0	0	0	0	0	0	0	0	0	0	1	0	0	0	1	0	0	0	0	1	0	0	0	0	0	1	1	1	1	0	0	0	0	0	88
4700	048	2	80	3	1	4	11	4	9	5	0	2	5	Siblings and grandchildren	0	0	0	0	0	0	0	0	0	1	0	0	0	0	0	0	0	0	0	1	0	0	0	0	0	1	0	0	0	0	1	0	0	0	88
4700	015	2	80	3	2	5	1	1	0	4	0	2	5	Sister	0	0	0	0	0	0	0	0	0	0	0	0	0	0	0	0	0	0	0	1	0	0	0	1	0	1	0	0	0	0	0	0	1	0	88
700	014	2	80	3	1	4	4	5	0	5	0	2	1	88	0	0	0	0	0	1	0	0	0	0	0	0	0	0	0	0	0	0	0	0	0	0	0	0	0	0	0	0	0	0	0	0	1	0	88
6800	057	1	80	3	2	1	13	2	0	6	0	2	1	88	0	0	0	0	0	0	0	0	0	0	0	0	0	0	0	0	0	0	0	0	0	0	0	1	0	0	0	0	0	0	0	0	0	0	88
22700	002	2	80	3	1	1	7	4	0	10	4	3	5	Grandson	1	0	0	0	0	0	0	0	0	1	0	0	0	0	0	0	0	0	0	0	0	0	0	0	0	0	0	0	0	0	0	0	0	0	88
4302	167	2	80	3	1	4	11	5	0	9	2	1	5	Niece	0	0	0	0	0	0	0	0	0	0	0	0	0	0	0	0	0	0	0	1	0	0	0	0	0	1	0	0	0	0	0	0	1	0	88
6000	075	1	80	3	3	4	11	5	1	7	0	2	4	88	1	0	0	0	0	0	0	0	0	0	0	0	0	0	0	0	0	0	0	0	0	0	0	0	0	1	0	0	0	0	0	0	1	0	88
7400	035	2	80	3	1	1	13	5	0	10	0	9	4	88	0	0	0	0	0	0	0	0	0	0	0	0	0	0	0	0	0	0	0	0	0	0	0	1	0	0	0	0	0	0	0	0	1	0	88
25900	160	1	80	3	2	4	10	5	0	9	0	2	4	88	1	0	0	0	0	0	0	0	0	0	0	0	0	0	0	0	0	0	0	0	0	0	0	0	0	0	0	0	0	0	0	0	1	0	88
26400	043	1	80	3	1	1	2	3	0	10	0	2	5	Spouse and children	0	0	1	0	0	0	0	0	0	0	0	0	0	0	0	0	0	0	0	1	0	0	0	0	0	0	0	0	0	0	0	0	0	0	88
16400	022	2	80	3	1	4	4	3	0	10	0	2	2	88	1	0	0	0	0	0	0	0	0	0	0	0	0	0	0	0	0	0	0	0	0	0	0	1	0	0	0	0	0	0	0	0	0	0	88
7100	013	2	80	3	2	3	16	3	0	7	0	2	2	88	1	0	0	0	0	0	0	0	0	0	0	0	0	0	0	0	0	0	0	0	0	0	0	1	0	0	0	0	0	0	0	0	1	0	88
7100	001	2	80	3	4	1	1	5	0	3	0	2	4	88	1	0	0	0	0	0	0	0	0	1	0	0	0	0	0	0	0	0	0	1	0	0	0	0	0	1	0	0	0	0	0	0	0	0	88
1900	039	2	80	3	1	7	6	5	0	10	0	2	4	88	0	0	1	0	0	0	0	0	0	0	0	0	0	0	1	0	0	1	1	1	0	0	0	0	0	1	0	1	1	0	0	1	0	1	Poor circulation
3400	120	1	80	2	9	4	4	5	0	1	0	2	1	88	0	0	0	0	0	0	0	0	0	1	1	0	0	0	1	0	0	0	0	0	0	0	0	0	0	0	0	0	1	0	1	0	1	0	88
18300	017	2	81	3	1	7	10	5	0	5	0	1	5	Daughter son in law and grandchildren	1	0	1	0	0	0	0	0	0	0	0	0	0	0	1	0	0	1	1	1	0	0	0	0	0	1	1	0	1	0	0	1	1	0	88
1900	059	1	81	3	1	1	10	4	0	9	0	6	1	88	0	1	0	0	0	0	0	0	0	1	0	0	0	0	0	0	0	0	0	0	0	0	1	0	0	0	0	0	0	0	1	0	0	1	Prostate medication
13000	021	1	81	3	1	4	4	2	0	1	0	9	3	88	1	0	0	0	0	0	0	0	0	1	0	0	0	0	1	0	0	0	0	0	0	0	0	0	0	0	0	0	1	0	1	0	0	0	88
3602	026	1	81	3	2	1	10	3	0	9	0	2	5	Spouse and child	1	0	0	0	0	0	0	0	0	1	0	0	0	0	0	0	0	0	0	1	0	0	0	0	0	1	0	0	0	0	1	0	0	0	88
1000	064	2	81	3	1	1	1	5	0	5	0	2	4	88	0	0	0	0	0	0	0	0	0	0	0	0	0	0	0	0	0	0	0	0	0	0	0	0	0	0	0	0	0	0	0	0	0	0	88
9700	013	1	81	3	1	4	13	5	0	2	0	2	4	88	1	0	0	0	0	0	0	0	0	0	0	0	0	0	0	0	0	0	0	1	0	0	0	0	0	1	0	0	0	0	0	0	0	0	88
20300	053	2	81	3	1	1	2	6	0	10	0	2	4	88	0	0	1	0	0	0	0	0	0	1	0	0	0	0	0	0	0	0	0	1	0	0	0	0	0	1	0	0	0	0	1	0	0	0	88
12500	046	1	81	3	1	7	2	5	0	9	0	1	4	88	0	0	0	0	0	0	0	0	0	1	0	0	0	0	0	0	0	0	0	1	0	0	1	0	0	0	0	0	0	0	0	0	0	1	Prostate medication
16100	114	2	81	3	1	4	4	5	9	6	0	2	4	88	1	0	0	0	0	0	0	0	0	0	0	0	0	0	1	0	0	0	0	1	1	0	0	0	0	1	0	0	1	0	0	0	0	1	Medication for nerves
4300	026	1	81	3	1	4	13	3	9	10	0	2	3	88	0	0	0	0	0	0	0	0	0	0	0	0	0	0	0	0	0	0	0	0	1	0	0	0	0	0	0	0	0	0	1	0	0	0	88
16100	041	1	81	3	1	4	4	5	9	5	0	2	4	88	1	0	0	0	0	0	0	0	0	1	0	0	0	0	0	0	0	0	0	1	0	0	0	0	0	1	0	0	0	0	1	0	0	0	88
4602	001	1	81	3	1	1	6	3	0	9	0	2	5	Wife and grandchild	0	1	0	0	0	0	0	0	0	1	0	0	0	1	0	0	0	0	0	1	1	0	0	0	0	1	1	0	0	0	1	0	0	1	Medication for trembling hands
28100	161	1	81	3	1	1	13	3	9	6	0	2	2	88	0	0	0	0	0	0	0	0	0	0	0	0	0	0	0	0	0	0	0	0	0	0	0	0	0	0	0	0	0	0	0	0	0	0	88
16600	069	2	81	3	1	1	1	5	0	5	0	2	5	Grandson	1	0	0	0	0	0	0	0	0	0	0	0	0	0	1	0	0	0	0	1	0	0	0	0	0	1	0	0	1	0	0	0	0	0	88
1000	067	1	81	3	1	1	1	3	0	2	0	2	3	88	1	0	0	0	0	0	0	0	0	0	0	0	0	0	1	0	0	0	0	0	0	0	0	0	0	0	0	0	1	0	0	0	0	0	88
3500	176	1	81	3	1	1	10	4	0	9	0	2	1	88	1	0	0	0	0	0	0	0	0	1	0	0	0	0	0	0	0	0	0	1	0	0	0	0	0	1	0	0	0	0	1	0	0	0	88
28100	062	1	81	3	2	1	14	3	0	4	0	2	3	88	0	0	0	0	0	0	0	0	0	0	0	0	0	0	0	0	0	0	1	0	0	0	0	0	0	0	0	0	0	0	0	0	1	0	88
9001	108	2	81	3	2	1	6	5	0	7	0	2	1	88	0	0	0	0	0	0	0	0	0	1	0	0	0	0	0	0	0	0	0	0	0	0	0	0	0	0	0	0	0	0	0	0	0	0	88
9001	091	1	81	3	1	1	13	2	1	9	0	2	5	Grandson	1	0	0	0	0	0	0	0	0	0	0	0	0	0	0	0	0	0	0	0	0	0	1	0	0	0	0	0	0	0	0	0	0	1	Eye medication
22700	002	2	81	3	1	7	14	5	0	10	4	3	1	88	0	0	0	0	0	0	0	0	0	1	0	0	0	0	0	0	0	0	1	1	0	0	0	0	0	1	0	0	0	0	0	1	0	0	88
1900	106	2	81	3	1	4	10	5	0	2	0	2	4	88	0	0	0	0	0	0	0	0	0	1	0	0	0	0	1	0	0	0	0	0	0	0	0	0	0	0	0	0	1	0	0	0	0	0	88
6800	049	2	81	3	1	4	10	5	0	99	0	2	4	88	1	0	0	0	0	0	0	0	0	0	0	0	0	0	0	0	0	1	0	0	0	0	0	0	0	0	1	0	0	0	0	0	0	1	Warfarin for heart
4402	005	2	81	3	1	4	4	5	0	8	0	2	5	Son and grandson	0	0	1	0	0	0	0	1	1	1	0	0	0	0	0	0	0	0	0	1	0	1	0	0	0	1	1	1	0	0	1	0	1	0	88
29400	062	1	81	3	2	1	1	3	0	9	0	2	2	88	1	0	0	0	0	0	0	0	0	0	0	1	0	0	0	0	0	0	0	0	0	0	1	1	0	0	0	0	0	0	0	0	0	1	Casodex and Rivotril
8600	059	1	81	3	3	4	4	3	0	3	0	2	2	88	1	0	1	0	0	0	1	0	0	0	0	0	0	0	0	0	0	1	0	1	0	1	0	0	0	1	0	0	0	0	0	0	0	1	Heart medication
7100	118	1	81	3	1	4	4	5	0	9	0	2	4	88	0	0	0	0	0	0	0	0	0	0	0	0	0	0	1	0	0	0	0	1	0	0	0	0	0	1	0	0	1	0	0	0	0	0	88
19400	075	2	81	3	2	1	1	4	0	4	4	3	4	88	1	0	1	0	0	0	0	0	0	1	0	0	0	0	0	0	0	0	0	1	0	0	0	0	0	1	1	0	0	0	1	0	1	0	88
4302	261	2	81	3	1	1	1	5	0	8	4	3	4	88	1	0	0	0	0	0	0	0	0	0	0	0	0	1	0	0	0	0	0	1	0	0	0	0	0	1	0	0	0	0	0	0	1	1	Medication for depression
21000	032	1	81	3	1	5	1	1	0	8	4	3	5	Nephew	1	0	0	0	0	0	0	0	0	0	0	1	0	0	1	0	0	0	1	1	0	0	0	0	0	1	0	1	1	1	1	1	0	1	Prostate medication
5600	028	2	81	3	1	4	4	5	0	2	0	2	4	88	0	0	1	0	0	0	0	0	0	0	0	0	0	0	0	0	0	0	0	0	0	0	0	1	0	0	0	0	0	0	0	0	1	0	88
10500	202	1	81	3	1	4	11	3	0	1	0	2	2	88	1	0	0	0	0	0	0	0	0	0	0	0	0	0	0	0	0	0	0	0	0	0	0	0	0	0	1	1	0	0	0	1	0	0	88
5600	101	2	81	3	1	7	17	5	0	5	0	2	4	88	0	0	1	0	0	0	0	0	0	1	0	0	0	0	1	0	0	0	0	0	0	0	0	0	0	0	0	0	1	0	1	0	0	0	88
21200	106	2	81	3	2	1	2	4	0	4	0	2	1	88	1	0	0	0	0	0	0	0	0	1	0	0	0	0	0	0	0	0	1	0	0	0	0	0	0	0	0	0	0	0	0	1	0	0	88
16400	052	2	81	3	2	1	1	1	0	4	0	2	5	Grandchildren	1	0	0	0	0	0	0	0	0	1	0	0	0	0	0	0	0	0	0	1	0	0	0	0	0	1	0	0	1	0	0	0	1	0	88
21700	144	1	81	3	1	1	13	3	0	2	0	2	2	88	0	1	0	0	0	0	0	0	0	0	0	0	0	0	1	0	0	0	0	1	0	0	0	1	0	1	0	0	1	0	0	0	0	0	88
8200	011	2	81	3	2	1	2	3	0	8	0	2	2	88	1	0	0	0	0	0	0	0	0	1	0	0	0	0	1	0	0	0	0	1	0	0	0	0	0	1	0	0	1	0	1	0	1	0	88
26400	088	2	81	3	1	1	14	5	0	6	0	2	1	88	0	0	1	0	0	0	0	0	0	0	0	0	0	0	0	0	0	0	0	1	0	0	0	0	0	1	0	0	0	0	0	0	1	0	88
4402	066	2	81	3	1	7	10	5	0	8	0	2	4	88	1	0	0	0	0	0	0	0	0	0	0	0	0	0	0	0	0	1	0	1	0	0	0	0	0	1	1	1	0	0	0	0	1	1	Nerve tablets and medication for poor circulation
19200	049	2	81	3	3	2	13	3	0	5	0	2	2	88	1	0	0	0	0	0	1	0	0	0	0	0	0	0	0	0	0	0	0	1	0	0	0	0	0	1	0	0	0	0	0	0	0	0	88
4302	252	2	81	3	1	7	13	5	0	10	4	3	4	88	0	0	0	0	0	0	0	0	0	0	0	0	0	0	0	0	0	0	0	0	0	0	0	0	0	1	0	0	0	0	0	0	0	0	88
19700	037	1	81	3	1	1	13	4	0	8	0	1	5	Children grandchildren and common law wife	0	0	0	0	0	0	0	0	0	0	0	0	0	0	1	0	0	0	0	0	0	0	0	0	0	0	0	0	1	0	0	0	0	0	88
22700	002	2	81	3	1	7	13	2	0	10	4	3	1	88	0	0	1	0	0	0	0	0	0	1	0	0	0	1	0	0	0	0	0	1	0	0	0	0	0	1	0	0	0	0	0	0	0	1	Eye drops
9600	033	1	81	3	1	1	13	4	0	7	0	2	5	Brother and sister	0	0	0	0	0	0	0	0	0	0	0	0	0	0	0	0	0	0	1	0	0	0	0	0	0	0	0	0	0	0	0	0	0	0	88
18000	016	1	81	3	0	1	1	4	9	10	0	4	1	88	0	0	0	0	0	0	0	0	0	0	0	0	0	0	0	0	0	0	0	0	0	0	0	0	0	0	0	0	0	0	0	0	1	0	88
11300	91	1	81	3	1	7	2	3	0	9	0	2	3	88	0	0	0	0	0	0	0	0	0	0	0	0	0	0	0	0	0	0	0	0	0	0	0	1	0	0	0	0	0	0	0	0	0	0	88
4302	272	2	81	3	1	1	10	5	0	9	4	4	4	88	0	0	0	0	0	0	0	0	0	0	0	0	0	0	0	0	0	0	0	1	0	0	0	0	0	1	0	0	0	0	1	0	0	0	88
14900	106	2	81	3	1	4	11	5	0	5	0	2	1	88	0	0	1	0	0	0	0	0	0	1	0	0	0	0	0	0	0	0	0	0	0	0	0	0	0	0	0	0	0	0	1	0	0	0	88
14900	043	2	81	3	1	1	11	5	0	5	0	2	1	88	0	0	0	0	0	0	0	0	0	0	0	0	0	0	0	0	0	0	0	1	0	0	0	0	0	1	0	0	0	0	0	0	0	0	88
5100	031	2	81	3	1	1	1	5	9	2	0	2	5	Nephew	1	0	0	0	0	0	0	0	0	0	0	0	0	0	0	0	0	0	0	1	0	0	0	0	0	1	1	0	0	0	0	0	1	0	88
2400	063	2	81	3	1	1	2	2	0	5	0	2	4	88	0	0	0	0	0	0	0	0	0	0	0	0	0	0	0	0	0	0	0	1	0	0	0	0	0	1	0	0	0	0	0	0	0	0	88
18300	001	2	81	3	2	1	1	5	0	7	0	2	4	88	0	0	0	0	0	0	0	0	0	0	0	0	0	0	0	0	0	0	0	0	0	0	0	1	0	0	0	0	0	0	0	0	0	0	88
19200	013	2	81	3	2	7	13	3	0	4	0	4	3	88	1	0	0	0	0	0	0	0	0	0	0	0	0	0	0	0	0	0	0	1	0	0	0	0	0	1	0	0	0	0	0	0	0	0	88
13100	054	1	81	3	3	4	11	5	1	3	0	9	1	88	0	0	0	0	0	0	0	0	0	0	0	0	0	0	0	0	0	0	0	0	0	0	0	1	0	0	0	0	0	0	0	0	1	0	88
13100	015	2	81	3	2	4	1	3	9	4	0	9	2	88	0	0	0	0	0	0	0	0	0	0	0	0	0	0	1	0	0	0	0	1	0	0	0	0	0	1	0	0	1	0	0	0	0	0	88
2400	041	2	81	3	3	7	17	4	0	3	0	2	1	88	1	0	0	0	0	0	0	0	0	0	0	0	0	0	1	0	0	0	0	0	0	0	0	0	0	0	0	0	1	0	0	0	0	0	88
500	046	1	81	3	2	1	17	3	9	9	0	2	3	88	1	0	0	0	0	0	0	0	0	0	0	0	0	0	0	0	0	0	0	1	0	0	0	0	0	1	0	0	0	0	0	0	0	0	88
15800	008	1	81	3	3	1	13	5	0	7	0	2	1	88	0	1	0	0	0	1	0	0	0	0	0	0	0	0	0	0	0	0	0	0	0	0	0	1	0	0	0	0	0	0	0	0	0	0	88
28100	037	2	81	3	3	7	13	3	0	6	0	1	5	Grandchildren	1	0	0	0	0	0	0	0	0	1	1	0	0	0	0	0	0	1	0	1	0	0	0	0	0	1	0	0	0	0	1	0	0	0	88
10500	110	1	82	3	1	3	1	3	0	6	0	2	3	88	1	0	0	0	0	0	0	0	0	0	1	0	0	0	0	0	0	0	0	0	0	0	1	0	0	1	1	1	0	0	1	0	1	1	COPD
18300	006	2	82	3	2	1	7	4	0	7	0	2	1	88	0	0	0	0	0	0	0	0	0	0	0	0	0	0	0	0	0	0	0	0	0	0	0	1	0	0	0	0	0	0	0	0	1	0	88
25400	033	1	82	3	1	1	13	5	0	8	0	1	1	88	0	0	0	0	0	0	0	0	0	0	0	0	0	0	0	0	0	0	0	0	0	0	0	1	0	0	0	0	0	0	0	0	0	0	88
1000	047	1	82	3	1	1	2	5	0	2	0	2	1	88	1	0	0	0	0	0	0	0	0	0	0	0	0	0	0	0	0	0	0	1	0	0	0	0	0	1	0	0	0	0	0	0	0	0	88
16800	055	1	82	3	1	4	4	3	0	4	0	2	2	88	1	0	0	0	0	0	0	0	0	0	1	0	0	0	0	0	0	0	0	0	0	0	0	0	0	1	0	0	0	0	0	0	1	1	Asthma medication
15400	003	2	82	3	3	4	11	3	0	7	0	2	2	88	1	0	0	0	0	0	0	0	0	0	0	0	0	0	0	0	0	0	1	0	0	0	0	0	0	0	0	0	0	0	0	1	0	0	88
13100	005	1	82	3	1	1	13	4	0	9	0	1	5	Nieces and nephews	0	0	0	0	0	0	0	0	0	1	0	0	0	0	0	0	0	0	0	1	0	1	0	0	0	1	0	0	0	0	1	0	1	0	88
32000	120	2	82	3	0	7	10	5	0	2	0	2	1	88	0	0	1	0	0	0	0	0	0	1	0	0	0	0	0	0	0	1	0	1	0	0	0	0	0	1	1	0	0	0	1	0	1	0	88
29400	125	1	82	3	4	1	14	3	0	9	0	2	2	88	1	0	0	0	0	1	0	0	0	0	0	0	0	0	0	0	0	0	0	0	0	0	1	0	0	0	0	0	0	0	0	0	1	1	Glaucoma medication
18000	084	1	82	3	1	7	10	3	0	9	0	2	2	88	0	1	0	0	0	1	1	0	0	1	0	0	0	0	0	0	0	0	0	0	0	1	1	0	0	0	0	1	0	0	0	0	1	1	Heart medication
5600	061	2	82	3	1	4	10	5	0	5	0	4	4	88	0	0	1	0	0	0	0	0	0	1	0	0	0	0	1	0	0	0	0	1	0	0	0	0	0	1	0	0	1	0	0	0	1	0	88
16100	103	1	82	3	1	4	4	5	0	1	0	2	1	88	1	0	0	0	0	0	0	0	0	0	0	0	0	0	0	0	0	0	0	0	0	0	0	1	0	0	0	0	0	0	0	1	0	0	88
28100	121	1	82	3	2	1	1	3	9	9	0	2	2	88	1	0	0	0	0	0	1	0	0	1	0	0	0	0	0	0	0	0	0	0	0	0	0	0	0	0	0	0	0	0	1	0	0	0	88
3500	143	2	82	3	1	7	13	3	0	4	0	2	3	88	0	0	0	0	0	0	0	0	0	1	0	0	0	0	0	0	0	0	0	0	0	0	0	1	0	0	0	0	0	0	1	0	0	0	88
27300	055	2	82	3	1	4	5	6	0	5	0	1	2	88	1	0	0	0	0	0	0	1	0	1	0	0	0	0	1	0	0	1	0	1	0	0	1	0	0	1	1	0	0	0	1	0	0	1	Oxygen for lungs
15400	020	1	82	3	4	1	10	3	0	9	0	2	2	88	0	0	0	0	0	0	0	0	0	0	0	0	0	0	0	0	0	0	0	0	0	0	0	1	0	0	0	0	0	0	0	0	1	0	88
700	009	1	82	3	1	5	2	4	0	9	0	4	1	88	1	0	0	0	0	0	0	0	0	0	0	0	0	0	0	0	0	0	0	0	0	0	0	0	0	0	0	0	0	0	0	0	1	1	Itching of skin
9001	076	2	82	3	1	1	1	5	0	4	0	2	4	88	1	0	0	0	0	0	0	0	0	0	0	0	0	0	0	0	0	1	0	1	0	0	1	0	0	1	0	1	0	0	0	0	0	1	Acid reflux
3200	074	2	82	3	1	4	4	5	0	5	0	2	5	Son and wife	1	0	0	0	0	0	0	0	0	1	0	0	0	0	0	0	0	0	1	1	0	0	0	0	0	1	1	0	0	0	1	1	1	0	88
3400	10	1	82	3	1	4	4	3	9	9	0	2	2	88	0	0	1	0	0	1	0	0	0	0	0	0	0	0	0	0	0	1	0	0	0	0	0	0	0	0	0	0	0	0	1	0	0	0	88
8600	007	2	82	3	1	7	14	5	0	10	0	2	1	88	0	0	1	0	0	0	0	0	0	0	0	0	0	0	0	0	0	1	0	1	0	0	0	0	0	0	0	0	0	0	0	0	0	1	Heart medication
16400	053	2	82	3	1	7	13	5	0	10	0	2	5	Children and grandchildren	1	0	0	0	0	0	0	0	0	1	0	0	0	0	0	0	0	0	0	0	0	0	0	0	0	0	0	0	0	0	1	0	0	0	88
26400	010	2	82	3	2	1	1	5	0	7	0	2	4	88	1	0	0	0	0	0	0	0	0	1	0	0	0	0	1	0	0	0	1	1	0	0	0	0	0	1	0	0	0	1	0	1	1	1	Eye drops
21700	089	2	82	3	1	4	11	5	0	5	0	2	4	88	1	0	0	0	0	0	0	0	0	0	0	0	0	0	1	0	0	0	0	1	0	0	0	0	0	1	1	0	1	0	0	0	0	0	88
26002	083	2	82	3	4	4	11	5	0	7	0	2	1	88	0	0	1	0	0	0	0	0	0	0	0	0	0	0	0	0	0	0	0	1	0	0	0	0	0	1	0	0	0	0	0	0	0	0	88
25900	032	2	82	3	1	7	1	4	0	10	0	1	5	Children and grandchildren	1	0	0	0	0	0	0	0	0	0	0	0	0	0	1	0	0	0	0	0	0	0	0	0	0	0	0	0	1	0	0	0	0	0	88
9200	092	2	82	4	1	4	5	5	9	8	0	2	4	88	0	0	0	0	0	0	0	0	0	1	0	0	0	0	0	0	0	0	0	0	0	0	0	0	0	0	1	0	0	0	0	0	0	0	88
11000	191	1	82	3	1	1	1	3	1	9	0	2	3	88	0	0	0	0	0	0	0	0	0	0	0	0	0	0	0	0	0	0	0	0	0	0	0	1	0	0	0	0	0	0	0	0	1	0	88
1900	050	2	82	3	1	4	4	5	0	1	4	1	4	88	1	0	0	0	0	0	0	0	0	0	0	0	0	0	0	0	0	0	1	1	0	1	0	0	0	1	0	0	0	0	0	1	0	1	Stroke medication and injections
19700	033	2	82	3	1	8	13	5	0	10	0	1	5	Grandson	0	0	0	0	0	0	0	0	0	0	0	0	0	0	0	0	0	0	0	0	0	0	1	0	0	1	0	0	0	0	0	0	0	0	88
7000	004	2	82	3	1	1	13	4	0	10	0	2	1	88	1	0	0	0	0	0	0	0	0	0	0	0	0	0	0	0	0	0	0	0	0	0	0	1	0	0	0	0	0	0	0	0	0	1	Eye medication
26002	052	2	82	3	1	4	13	5	0	5	0	2	4	88	1	0	0	0	0	0	0	0	0	1	0	0	0	0	0	0	0	0	0	1	0	0	0	0	0	1	0	0	0	0	1	0	0	0	88
8000	105	2	82	3	0	5	13	5	0	5	0	2	1	88	0	0	0	0	0	0	0	0	0	0	0	0	0	0	1	0	0	0	0	0	0	0	0	0	0	0	0	0	0	0	0	0	0	1	Surgery
2400	132	2	82	3	1	1	13	4	0	8	0	2	5	Son and grandchildren	0	0	0	0	0	0	0	0	0	1	0	0	0	0	0	0	0	0	0	1	0	0	0	0	0	1	0	0	0	0	1	0	0	0	88
4002	112	1	82	3	1	4	4	5	0	9	0	2	3	88	0	0	0	0	0	0	0	0	0	1	0	0	0	0	0	0	0	0	0	0	0	0	0	0	0	0	0	0	0	0	0	0	0	1	Arthritis
19400	041	1	82	3	1	1	13	5	0	9	0	2	1	88	1	0	0	0	0	0	0	0	0	0	0	0	0	0	0	0	0	0	0	1	0	0	0	0	0	1	0	0	0	0	0	0	0	0	88
20400	003	2	82	3	1	1	1	3	0	10	0	2	3	88	1	0	0	0	0	0	0	0	0	1	0	0	0	0	0	0	0	0	0	1	0	0	0	0	0	1	0	0	0	0	1	0	0	0	88
20400	003	1	82	3	1	1	1	3	0	10	0	2	3	88	1	0	0	0	0	0	0	0	0	0	1	0	0	0	0	0	0	0	0	0	0	0	0	0	0	0	0	0	0	0	0	0	0	1	Asthma medication
28100	130	2	82	3	3	7	13	3	9	7	0	2	2	88	0	0	0	0	0	0	0	0	0	0	0	0	0	0	1	0	0	0	0	0	0	0	0	0	0	0	0	0	1	0	0	0	0	0	88
19100	070	1	82	3	1	7	2	5	0	9	0	3	5	Grandchild	0	0	1	0	0	0	0	0	0	0	0	0	0	0	0	0	0	0	0	0	0	0	1	0	0	0	1	0	0	0	0	0	0	0	88
16400	081	1	82	3	1	4	16	4	0	10	0	2	1	88	0	0	0	0	0	0	0	0	0	0	0	0	0	0	1	0	0	0	0	1	0	0	0	0	0	1	0	0	1	0	0	0	0	1	Cataract medication
7500	020	2	82	3	1	7	14	3	0	5	0	2	3	88	1	0	0	0	0	0	0	0	0	1	0	0	0	0	0	0	0	0	0	1	0	0	0	0	0	1	0	0	0	0	0	0	1	0	88
2400	021	2	82	3	3	4	10	4	0	6	0	2	5	Sister	1	0	0	0	0	0	0	0	0	1	0	0	0	0	0	0	0	0	1	1	0	0	0	0	0	1	0	0	0	0	1	1	1	0	88
22700	002	2	83	3	1	1	17	2	0	10	4	3	4	88	0	0	0	0	0	0	0	0	0	0	0	0	0	0	1	0	0	0	1	1	0	0	0	0	0	1	1	0	1	0	0	1	0	0	88
2200	150	1	83	3	1	4	4	3	0	9	0	2	5	Spouse and son	0	0	1	0	0	0	0	0	0	0	0	0	0	0	1	0	0	0	0	0	0	0	0	0	0	0	0	0	1	0	1	0	0	0	88
2200	008	2	83	3	1	4	4	5	0	5	0	1	4	88	1	0	0	0	0	0	0	0	0	1	0	0	0	0	0	0	0	0	1	1	0	0	0	0	0	1	0	0	0	0	0	1	0	0	88
6800	006	2	83	3	1	1	13	5	0	4	0	1	4	88	0	0	1	0	0	0	0	0	0	0	0	0	0	0	1	0	0	0	0	0	0	0	0	0	0	0	0	0	1	0	0	0	0	0	88
26001	046	2	83	3	1	7	13	5	0	4	0	2	5	Grandchild	0	0	1	0	0	0	0	0	0	1	0	0	0	0	1	0	0	1	0	1	0	0	0	0	0	1	0	0	1	0	1	0	1	0	88
8600	048	2	83	3	4	7	13	5	0	7	0	2	4	88	1	0	0	0	0	0	0	0	0	1	0	1	0	0	1	0	0	0	1	1	0	0	1	0	0	1	1	0	1	0	0	1	0	1	Abdominal aneurysm
3602	022	1	83	3	1	4	4	3	0	7	0	1	5	Spouse and maid	1	0	0	0	0	0	0	0	0	0	0	0	0	0	0	0	0	0	0	0	0	0	0	1	0	0	0	0	0	0	1	0	0	0	88
15500	072	1	83	3	1	4	16	5	0	9	0	2	4	88	0	0	0	0	0	0	1	0	0	0	0	0	0	0	0	0	0	0	0	0	0	1	1	0	0	0	0	0	0	0	0	0	0	1	Medication for urinal problems
1000	112	2	83	3	9	1	10	5	0	1	0	2	1	88	1	0	0	0	0	0	0	0	0	0	0	0	0	0	1	0	0	0	0	0	0	0	0	0	0	0	0	0	1	0	0	0	0	0	88
18300	141	2	83	3	1	1	13	5	0	7	0	2	4	88	1	0	0	0	0	0	0	0	0	1	0	0	0	0	1	0	0	0	0	1	0	0	0	0	0	1	0	0	1	0	1	0	1	0	88
3601	241	2	83	3	1	1	10	3	0	8	0	2	3	88	1	0	0	0	0	0	0	0	0	1	0	0	0	0	0	0	0	0	0	1	0	0	0	0	0	1	0	0	0	0	1	0	1	0	88
27300	125	1	83	3	1	5	4	3	0	8	0	1	3	88	1	0	0	0	0	0	0	0	0	0	1	0	0	0	0	0	0	0	0	0	0	0	1	0	0	0	0	0	0	0	0	0	0	1	Medication for retaining water
16100	007	2	83	3	1	4	4	5	0	5	0	2	4	88	0	0	0	0	0	0	0	0	0	0	0	0	0	0	0	0	0	0	0	0	0	0	0	0	0	0	0	0	0	0	0	0	0	1	Vitamins
9001	029	2	83	3	1	1	13	5	0	10	0	2	1	88	1	0	0	0	0	0	0	0	0	0	0	0	0	0	1	0	0	0	0	1	0	0	1	0	0	1	0	0	1	0	0	0	0	0	88
15400	023	2	83	3	0	4	4	5	1	1	0	2	1	88	0	0	0	0	0	0	0	0	0	0	0	0	0	0	0	0	0	0	0	1	0	0	0	0	0	1	0	0	0	0	0	0	0	0	88
4002	106	2	83	3	1	1	1	5	0	7	0	2	3	88	0	0	1	0	0	0	0	0	0	0	0	0	0	0	0	0	0	1	0	1	0	0	1	0	0	1	0	0	0	0	0	0	0	1	Heart medication
13000	041	1	83	3	2	4	4	3	9	7	0	2	2	88	0	0	0	0	0	0	0	0	0	1	0	0	0	0	0	0	0	0	0	0	0	0	0	0	0	0	0	0	0	0	1	0	0	0	88
21700	010	1	83	3	1	4	4	5	0	2	0	2	1	88	1	0	0	0	0	0	1	0	0	0	0	0	0	0	0	0	0	0	0	0	0	0	0	1	0	0	0	0	0	0	0	0	0	1	Prostate medication
21700	018	1	83	3	1	4	4	3	0	99	0	2	2	88	0	0	0	0	0	0	0	0	0	0	0	0	0	0	0	0	0	0	0	0	0	0	0	1	0	0	0	0	0	0	0	0	0	0	88
5600	053	2	83	3	1	1	2	5	0	8	0	4	4	88	0	0	0	0	0	0	0	0	0	0	0	0	0	0	0	0	0	0	0	0	0	0	0	1	0	0	0	0	0	0	0	0	0	0	88
8000	004	2	83	3	0	4	4	5	0	5	0	2	4	88	0	0	1	0	0	0	0	0	0	1	0	0	0	0	0	0	0	0	0	0	0	0	0	0	0	0	0	0	0	0	1	0	0	0	88
26300	075	1	83	3	1	1	13	5	0	2	0	2	4	88	0	0	1	0	0	0	0	0	0	0	0	0	0	0	1	0	0	0	0	1	0	1	0	0	0	0	0	0	1	0	0	0	1	0	88
4402	051	2	83	3	1	1	1	5	0	5	0	4	1	88	0	0	0	0	0	0	0	0	0	0	0	0	0	0	0	0	0	1	0	1	0	0	0	0	0	1	0	0	0	0	0	0	0	0	88
7000	004	1	83	3	1	1	13	5	0	9	0	2	1	88	0	0	1	0	0	0	0	0	0	0	0	0	0	0	0	0	0	0	0	0	0	0	0	0	0	0	0	0	0	0	1	0	0	0	88
7400	047	2	83	3	1	1	13	4	0	10	0	9	4	88	0	0	0	0	0	0	0	0	0	1	0	0	0	0	0	0	0	0	0	0	0	0	0	0	0	0	0	0	0	0	0	0	1	0	88
4700	070	2	83	3	1	4	13	5	0	5	0	2	1	88	0	0	0	0	0	0	0	0	0	0	0	0	0	0	1	0	0	1	0	0	0	0	0	0	0	0	1	0	1	0	0	0	1	0	88
8000	036	2	83	3	0	4	4	5	0	5	0	2	4	88	0	0	0	0	0	0	0	0	0	0	0	0	0	0	0	0	0	0	0	0	0	0	1	0	0	0	0	0	0	0	0	0	0	1	Heart medication
26002	077	1	83	3	1	1	13	5	0	9	0	2	5	Brother	0	0	0	0	0	0	0	0	0	0	0	0	0	0	0	0	0	0	0	1	0	0	0	0	0	1	0	0	0	0	0	0	0	0	88
2400	127	2	83	3	1	7	13	5	0	5	0	2	4	88	1	0	0	0	0	0	0	0	0	0	0	0	0	0	0	0	0	0	1	1	0	0	0	0	0	1	0	0	0	0	0	1	0	0	88
13600	027	2	83	2	1	4	4	5	0	99	0	2	4	88	1	0	0	0	0	0	0	0	0	0	0	0	0	0	1	0	0	0	0	0	0	0	0	0	0	0	0	0	1	0	0	0	0	0	88
29400	013	2	83	3	1	7	13	5	0	5	0	2	4	88	1	0	0	0	0	0	0	0	0	1	0	0	0	0	0	0	0	0	0	0	0	0	0	0	0	0	0	0	0	0	0	0	1	0	88
8300	016	2	83	3	1	7	13	5	0	10	0	1	5	Child and grandchildren	1	0	0	0	0	0	0	0	0	0	0	0	0	0	1	0	0	1	0	1	0	0	0	0	0	1	1	0	1	0	0	0	1	0	88
12400	110	2	84	3	1	4	4	5	0	5	0	1	4	88	0	0	0	0	0	0	0	0	0	0	0	0	0	0	1	0	0	1	0	1	0	0	0	0	0	1	1	0	1	1	0	0	0	0	88
20300	058	1	84	3	1	1	6	5	0	9	0	2	1	88	1	0	0	0	0	0	0	0	0	0	0	0	0	0	0	0	0	0	0	1	0	0	0	0	0	1	0	0	0	0	1	0	0	0	88
4001	110	1	84	3	1	7	16	5	0	8	0	2	5	Daughter and grandson	0	0	1	0	0	0	0	0	0	1	0	0	0	0	0	0	0	0	0	0	0	0	0	0	0	0	0	0	0	0	0	0	0	1	Arthritis
5001	24	2	84	3	0	4	4	5	0	1	0	2	5	Grandchildren	1	0	0	0	0	0	0	0	0	1	0	0	0	0	0	0	0	0	0	0	0	0	0	0	0	0	0	0	0	0	1	0	0	0	88
12500	135	2	84	3	0	4	4	5	0	5	0	1	1	88	1	0	0	0	0	0	0	0	0	1	0	0	0	0	1	0	0	1	0	1	0	1	0	0	0	1	1	0	1	0	1	0	0	0	88
2200	86	2	84	3	1	4	4	5	0	5	0	1	5	Child grandchildren and daughter in law	0	0	1	0	0	0	0	0	0	1	0	0	0	0	0	0	0	0	0	0	0	1	0	0	0	0	0	0	0	0	1	0	0	0	88
25400	150	1	84	3	2	7	16	3	0	9	0	1	2	88	0	0	0	0	0	0	0	0	0	0	0	0	0	0	0	0	0	0	0	1	0	0	0	0	0	1	0	0	0	0	0	0	0	0	88
20400	037	2	84	3	1	1	13	3	0	10	0	2	3	88	1	0	0	0	0	0	0	0	0	1	0	0	0	0	1	0	0	0	1	1	0	0	0	0	0	1	0	0	1	0	1	0	1	0	88
1900	017	2	84	3	1	7	13	5	0	7	0	2	5	Grandchild	1	0	1	0	0	0	0	0	0	0	0	0	0	0	1	0	0	0	0	1	0	0	0	0	0	1	0	0	1	0	0	0	0	1	Glaucoma medication
3600	020	2	84	3	0	4	4	5	0	8	0	2	5	Children grandchildren and inlaws	1	0	0	0	0	0	0	1	1	1	0	0	0	0	0	0	1	1	0	0	0	0	0	0	0	1	1	0	0	1	1	0	0	1	Retaining water in body
4300	047	2	84	3	1	7	13	3	0	5	0	2	2	88	0	0	0	0	0	0	1	0	0	0	0	0	0	0	0	0	0	1	0	1	0	0	0	0	0	0	1	1	0	0	0	0	0	0	88
6700	064	1	84	3	3	7	13	3	0	7	0	2	2	88	0	0	0	0	0	0	0	0	0	1	0	0	0	0	0	0	0	0	0	0	0	0	0	0	0	0	0	0	0	0	1	0	0	0	88
9001	028	2	84	3	1	7	6	5	9	8	0	1	5	Son in law and daughters	1	0	0	0	0	0	0	0	0	0	0	0	0	0	0	0	0	0	1	1	0	0	0	0	0	1	0	0	0	0	0	0	0	0	88
11300	039	2	84	3	1	7	13	4	0	10	0	2	1	88	1	0	0	0	0	0	0	0	0	0	0	0	0	0	0	0	0	1	0	1	0	0	0	0	0	1	0	0	0	0	0	0	0	1	Heart medication
7000	014	2	84	3	1	1	8	3	0	9	0	2	3	88	1	0	0	0	0	0	0	0	0	1	0	0	0	0	0	0	0	0	0	1	0	0	0	0	0	1	0	0	1	0	1	0	0	0	88
20300	047	2	84	3	1	1	10	1	0	10	0	2	1	88	1	0	0	0	0	0	0	0	0	0	0	0	0	0	0	0	0	0	1	1	0	0	0	0	0	1	0	0	0	0	1	1	1	0	88
26400	015	1	84	3	1	7	10	3	0	9	0	4	1	88	1	0	0	0	0	0	0	0	0	0	0	0	0	0	0	0	0	0	0	1	0	0	0	0	0	1	0	0	0	0	0	0	1	0	88
29400	089	1	84	3	1	1	13	3	0	2	0	2	5	Children and grandchildren	1	0	0	0	0	0	0	0	0	0	0	0	0	0	1	0	0	0	0	1	0	0	0	0	0	1	0	0	1	0	0	0	1	0	88
24602	010	2	84	3	1	4	4	5	0	5	0	1	1	88	1	0	0	0	0	0	0	0	0	0	0	0	0	0	0	0	0	0	0	1	0	0	0	0	0	0	0	1	0	0	0	0	1	0	88
19100	111	1	84	3	1	4	4	5	0	8	0	1	5	Son in law and daughter	0	0	0	0	0	0	0	0	0	0	0	0	0	0	0	0	0	0	0	0	1	0	0	1	0	0	0	0	0	0	0	0	0	1	Parkinsons Disease
1800	064	2	84	3	1	1	14	3	0	5	0	2	3	88	1	0	0	0	0	0	0	0	0	1	0	0	0	0	1	0	0	0	0	0	0	0	0	0	0	1	0	0	1	1	1	0	0	0	88
2400	035	1	84	3	1	4	4	3	0	10	0	2	3	88	1	0	0	0	0	0	0	0	0	1	1	0	0	0	1	0	0	0	0	1	0	0	0	0	0	1	0	0	1	0	1	0	0	0	88
15500	068	1	84	3	1	7	13	3	0	9	0	2	5	Brother	0	0	0	0	0	0	1	0	0	0	0	0	0	0	0	0	0	0	0	0	0	0	0	1	0	0	0	0	0	0	0	0	1	0	88
6000	083	2	84	3	0	4	4	5	0	5	0	2	1	88	0	0	1	0	0	0	0	0	0	0	0	0	0	0	0	0	0	0	0	1	0	0	0	0	0	1	0	0	0	0	0	0	0	0	88
19700	056	2	84	3	1	5	13	5	0	5	0	1	5	Daughter and nephew	0	0	0	0	0	0	0	0	0	0	0	0	0	0	0	0	0	0	0	0	0	0	0	0	0	0	0	0	0	0	0	0	0	1	Vitamins
3400	067	2	84	3	2	7	13	3	0	6	2	9	2	88	0	0	0	0	0	0	0	0	0	0	0	0	0	0	0	0	0	0	0	0	0	0	0	1	0	0	0	0	0	0	1	0	1	0	88
3701	102	2	84	2	2	1	13	5	0	6	0	2	5	Sister	0	0	0	0	0	0	0	0	0	0	0	0	0	0	1	0	0	0	1	0	0	0	0	0	0	0	0	0	1	0	0	1	0	0	88
700	037	2	84	3	1	7	13	4	9	5	0	2	4	88	0	0	0	0	0	0	0	0	0	0	0	0	0	0	0	0	0	0	0	0	0	0	0	1	0	0	0	0	0	0	0	0	1	0	88
21200	091	2	84	3	1	1	2	3	0	10	0	2	2	88	1	0	0	0	0	0	0	0	0	0	0	0	0	0	0	0	0	0	0	1	0	0	0	0	0	1	0	0	0	0	0	0	0	0	88
19100	191	1	84	3	1	4	4	3	0	8	0	3	3	88	0	0	1	0	0	0	0	0	0	0	0	0	0	0	0	0	0	0	0	0	0	0	0	1	0	0	0	0	0	0	0	0	0	1	Eye medication
25900	103	2	84	3	1	1	17	3	0	7	0	2	2	88	0	0	0	0	0	1	0	0	0	0	0	0	0	0	0	0	0	0	0	0	0	0	0	0	0	0	0	0	0	0	0	0	1	0	88
7400	089	2	84	3	1	7	13	5	0	9	0	9	1	88	0	0	0	0	0	0	0	0	0	0	0	0	0	0	0	0	0	1	0	1	0	0	0	0	0	1	0	0	0	0	1	0	1	0	88
21700	142	1	84	3	2	1	1	3	0	7	0	2	2	88	0	0	0	0	0	0	0	0	0	0	0	0	0	0	0	0	0	0	0	0	0	0	0	1	0	0	0	0	0	0	0	0	0	0	88
19400	075	2	84	3	1	1	14	4	9	3	2	3	4	88	0	0	0	0	0	0	0	0	0	1	0	0	0	0	0	0	0	0	0	0	0	0	0	0	0	0	0	0	0	0	1	0	0	0	88
3200	052	1	84	3	1	4	4	3	0	6	0	2	3	88	0	0	0	0	0	0	0	0	0	0	0	0	0	0	0	0	0	0	1	0	0	0	0	0	0	0	0	0	0	0	0	0	1	0	88
9001	095	2	84	3	1	2	13	2	0	8	0	2	1	88	0	0	0	0	0	0	0	0	0	1	0	0	0	0	0	0	0	0	0	0	0	0	0	0	0	0	0	0	0	0	1	0	0	0	88
10900	040	2	84	3	1	4	10	5	0	5	0	2	1	88	0	0	0	0	0	0	0	0	0	0	0	0	0	0	0	0	0	0	0	0	0	0	0	1	0	0	0	0	0	0	0	0	0	0	88
7100	028	2	84	3	2	1	10	5	0	5	0	2	1	88	1	0	0	0	0	0	0	0	0	0	0	0	0	0	0	0	0	0	0	0	0	0	0	1	0	0	0	0	0	0	0	0	0	0	88
21200	030	2	75	2	1	1	2	5	0	9	0	4	4	88	1	0	0	0	0	0	0	0	0	0	0	0	0	0	1	0	0	0	0	1	0	1	0	0	0	1	1	0	1	0	0	0	1	0	88
22700	001	1	75	2	1	1	13	1	0	9	4	3	5	Friend and his daughter and cousin	0	0	1	0	0	0	0	0	0	1	0	0	0	0	0	0	1	0	0	0	0	0	0	0	0	0	0	0	0	0	0	0	0	0	88
1900	091	1	75	2	0	4	4	5	0	2	0	2	4	88	1	0	1	0	0	0	0	0	0	0	0	0	0	0	0	0	0	0	1	0	0	1	0	0	0	0	0	1	0	0	0	1	1	1	Stroke injections
1900	088	1	75	2	1	4	5	5	0	2	0	2	4	88	0	0	0	0	0	0	0	0	0	0	1	0	0	0	0	0	0	0	0	0	0	0	0	0	0	0	0	0	0	0	0	0	0	1	Asthma medication
5900	080	1	75	2	0	7	13	5	0	10	0	2	5	Daughter and grandson	1	0	1	0	0	0	0	0	0	1	1	1	0	0	1	0	0	0	0	1	0	0	0	0	0	1	1	0	1	0	1	0	0	0	88
26300	041	2	75	2	1	7	10	5	0	9	0	1	5	Children and grandchildren	0	0	0	0	0	0	0	0	1	1	0	0	0	0	0	0	0	0	0	0	0	0	0	0	0	0	0	0	0	0	0	0	1	0	88
15800	007	2	75	2	1	1	2	3	0	5	0	2	5	Spouse and grandchildren	1	0	1	0	0	0	0	0	0	0	0	0	0	0	1	0	0	1	1	1	0	1	0	0	0	1	1	1	1	0	0	1	0	0	88
28900		2	75	2	1	4	4	1	0	9	0	2	4	88	0	1	1	0	0	0	0	0	0	1	0	0	0	1	0	0	0	0	0	1	0	1	0	0	0	1	0	0	0	0	0	0	0	0	88
3500	140	1	75	2	1	7	10	3	0	8	0	2	2	88	0	1	0	0	0	0	0	0	0	0	0	1	0	0	0	0	0	0	1	0	0	0	0	0	0	0	0	0	0	0	0	1	0	0	88
8000	085	1	75	2	1	4	4	3	0	1	0	2	3	88	0	0	1	0	0	0	0	0	0	0	0	0	0	0	0	0	0	0	0	0	0	1	0	0	0	0	0	0	0	0	0	0	0	1	Stroke medication
26400	098	1	75	2	1	7	13	3	0	9	0	2	2	88	0	0	1	0	0	0	0	0	0	0	0	0	0	0	0	0	0	0	0	0	0	1	0	0	0	0	0	0	0	0	0	0	1	0	88
10900	009	1	75	2	1	4	13	3	0	2	0	1	3	88	0	0	1	0	0	0	0	0	0	1	0	0	0	0	1	0	0	0	1	1	0	0	0	0	0	0	1	0	1	0	1	1	0	0	88
20300	055	2	75	2	1	1	2	5	0	10	0	2	1	88	1	0	0	0	0	0	0	0	0	1	0	0	0	0	1	0	0	1	1	1	0	0	0	0	0	1	0	1	1	0	1	1	0	0	88
20400	045	1	75	2	1	1	13	3	0	9	0	2	3	88	1	1	0	0	0	0	0	0	0	0	0	0	0	0	0	0	0	0	1	1	0	1	0	0	0	1	1	0	0	0	1	1	0	0	88
3600	186	2	75	2	1	4	4	5	0	5	0	2	5	Grandchildren	1	0	0	0	0	0	0	0	0	0	0	0	0	0	0	0	0	0	0	0	0	0	0	0	0	0	0	0	0	0	1	0	1	0	88
10500	149	1	75	2	0	4	5	2	0	2	0	1	5	Grandchildren	1	0	1	1	0	0	1	0	0	0	0	0	0	0	1	0	0	0	1	1	0	0	0	0	0	1	1	1	1	0	1	1	1	1	Skin condition
3600	054	2	75	2	1	4	4	3	0	5	0	2	3	88	1	0	0	0	0	0	0	0	0	1	0	0	0	0	1	0	0	1	0	1	0	0	0	0	0	1	1	0	1	1	1	0	0	1	Ulcer medication
19000	127	2	75	2	1	4	5	5	9	5	0	1	5	Grandchildren inlaw and children	0	1	0	0	0	0	0	0	0	0	0	0	0	0	1	0	0	0	1	0	0	1	0	0	0	1	0	0	1	0	1	1	0	0	88
13700	080	1	75	2	0	4	4	5	0	2	0	2	4	88	0	0	1	0	0	0	0	0	0	0	0	0	0	0	0	0	0	0	0	0	0	0	0	1	0	0	0	0	0	0	0	0	1	0	88
20400	049	1	75	2	1	1	2	5	0	9	0	2	1	88	0	0	0	0	0	0	0	0	0	0	0	0	0	0	0	0	0	0	0	0	0	0	0	1	0	0	0	0	0	0	0	0	0	1	Nerves medication
27300	142	2	76	2	0	4	16	5	0	5	0	1	4	88	1	0	0	0	0	0	0	0	0	1	0	0	1	0	0	0	0	0	0	0	0	0	0	0	0	0	0	0	0	0	1	0	0	0	88
28100	143	1	76	2	1	1	13	5	0	10	0	1	5	Stepson and grandchildren	0	0	0	0	0	0	0	0	0	0	0	0	0	0	0	0	0	0	0	0	0	1	0	0	0	0	0	0	0	0	0	0	0	0	88
4402	077	2	76	2	1	1	13	5	0	5	0	2	4	88	1	0	0	0	0	0	0	1	1	1	0	0	0	0	0	0	0	1	0	1	0	0	0	0	1	1	1	1	0	0	0	0	1	0	88
3600	054	1	76	2	1	4	4	3	0	9	0	2	3	88	1	0	0	0	0	0	0	0	0	0	0	0	0	0	1	0	0	0	0	0	0	0	0	0	0	0	0	0	1	0	0	0	1	0	88
16600	098	2	76	2	1	4	4	5	1	2	0	2	4	88	1	0	0	0	0	0	0	0	0	1	0	0	0	0	0	0	0	0	0	1	0	0	0	0	0	0	1	0	0	0	1	0	0	0	88
21700	155	2	76	2	1	7	14	4	0	10	4	6	5	Home	1	0	0	0	0	0	0	0	0	0	0	0	0	0	0	0	0	0	0	0	0	0	0	1	0	0	1	0	1	1	0	0	0	0	88
5800	036	1	76	2	0	4	4	3	0	9	0	2	2	88	1	0	0	0	0	0	0	0	0	0	0	0	0	0	0	0	0	0	0	1	0	1	0	0	0	1	0	1	0	0	0	0	0	0	88
18000	081	1	76	2	1	4	4	5	0	9	0	2	4	88	1	0	0	0	0	0	0	0	0	0	0	0	0	0	0	0	0	0	0	0	0	0	0	1	0	0	0	0	0	0	0	0	0	0	88
3601	123	1	76	2	1	1	2	5	0	9	0	2	4	88	0	0	0	0	0	0	0	0	0	0	0	0	0	0	0	0	0	0	0	0	0	0	0	0	0	0	0	0	0	0	0	0	0	0	88
6000	094	1	76	2	1	1	10	3	0	9	0	2	2	88	0	0	0	0	0	0	0	0	0	1	0	0	0	0	1	0	0	0	0	1	0	1	0	0	0	1	0	0	1	0	1	0	1	0	88
3200	106	2	76	2	1	4	5	3	0	5	0	2	2	88	1	1	0	0	0	0	0	0	0	0	0	0	0	0	0	0	0	0	0	0	0	0	0	0	0	0	0	0	0	0	0	0	0	0	88
12400	042	2	76	2	1	4	4	5	0	2	0	1	4	88	1	0	0	0	0	0	0	0	0	1	0	0	0	0	1	0	0	0	1	1	0	0	0	0	0	1	1	0	1	0	0	1	0	0	88
16400	101	2	76	2	1	4	4	5	0	10	0	2	4	88	1	0	1	0	0	0	0	0	0	1	0	0	0	0	0	0	0	0	0	0	0	0	0	0	0	0	0	0	0	0	0	0	1	0	88
13000	049	1	76	2	1	4	4	5	0	9	0	1	4	88	0	0	1	0	0	0	0	0	0	0	0	0	0	0	1	0	0	1	0	0	0	0	0	0	0	1	0	0	1	0	1	0	0	0	88
10900	034	2	76	2	1	4	13	3	0	2	0	2	3	88	0	0	1	0	0	0	0	0	0	1	0	0	0	0	0	0	0	0	0	1	0	0	1	0	0	1	1	0	0	0	0	0	0	1	Thyroid medication
9601	092	2	76	2	1	1	13	4	0	7	2	3	5	Grandchildren son in law and daughter	0	0	0	0	0	0	0	0	0	1	0	0	0	0	1	0	0	0	0	0	0	0	0	0	0	0	1	0	0	1	0	0	0	0	88
14900	147	2	76	2	1	4	10	5	0	2	0	2	5	Son and daughter in law and grandchildren	0	0	0	0	0	0	0	0	0	0	0	0	0	0	1	0	0	0	0	1	0	0	0	0	0	1	0	0	1	0	0	0	0	0	88
9100	061	1	76	2	1	4	11	3	0	2	0	1	2	88	0	0	0	0	0	0	0	0	0	0	0	0	0	0	0	0	0	0	0	0	0	1	0	0	0	0	0	0	0	0	1	0	0	0	88
26002	035	1	76	2	2	1	13	3	0	4	0	2	2	88	0	0	0	0	0	0	0	0	0	0	0	0	0	0	0	0	0	0	0	0	0	0	0	1	0	0	0	0	0	0	0	0	0	0	88
13100	091	1	76	2	1	4	4	5	0	10	0	1	5	Sister	0	0	0	0	0	0	0	0	0	0	0	0	0	0	0	0	0	0	0	0	0	0	0	1	0	0	0	0	0	0	0	0	0	0	88
5500	065	2	76	2	1	4	4	3	9	5	0	2	3	88	0	0	0	0	0	0	0	0	0	1	0	0	0	0	1	0	0	0	0	1	0	0	0	0	0	1	0	0	1	0	0	0	0	0	88
5500	077	1	76	2	1	4	11	3	0	9	0	4	3	88	0	0	0	0	0	0	0	0	0	0	0	0	0	0	1	0	0	0	0	1	0	0	0	0	0	1	0	0	1	0	0	0	0	0	88
18300	009	2	76	2	3	1	13	4	0	4	0	2	5	Sister brother and son	1	0	0	0	0	0	0	0	0	0	0	0	0	0	0	0	0	0	0	1	0	0	0	0	0	1	0	0	0	0	0	0	0	0	88
26400	095	2	76	2	1	1	6	5	0	10	0	2	4	88	1	0	0	0	0	0	0	0	0	1	0	0	0	0	0	0	0	0	1	1	0	0	0	0	0	1	0	0	0	0	1	1	0	0	88
6001	100	1	76	2	1	4	11	3	0	9	0	2	3	88	0	0	0	0	0	0	0	0	0	0	0	0	0	0	1	0	0	0	0	1	0	1	0	0	0	1	0	0	1	0	0	0	0	0	88
13100	059	2	76	2	2	7	13	3	0	4	0	9	2	88	0	0	0	0	0	0	0	0	0	0	0	0	0	0	0	0	0	0	0	1	0	0	0	0	0	1	0	0	0	0	0	0	0	0	88
3200	082	1	77	2	1	4	4	3	0	2	0	2	3	88	0	0	0	0	0	0	0	0	0	0	0	0	0	0	1	0	0	0	0	1	0	0	0	0	0	1	0	0	1	0	0	0	1	0	88
6700	225	2	77	2	1	7	13	4	0	8	0	2	4	88	1	0	1	0	0	0	0	0	0	1	0	0	0	0	1	0	0	0	0	1	0	0	0	0	0	1	0	0	1	1	1	0	0	0	88
2200	150	2	77	2	1	4	4	3	0	5	0	2	5	Spouse and son	0	0	1	0	0	0	0	0	0	0	0	0	0	0	1	0	0	0	0	0	0	1	0	0	0	0	0	0	1	0	1	0	0	0	88
16800	030	1	77	2	1	4	10	5	0	4	0	2	5	Son grandchildren and daughter in law	0	0	0	0	0	0	0	0	0	0	0	0	0	0	1	0	0	1	0	0	0	0	0	0	0	0	0	0	1	0	0	0	0	1	Heart medication
4202	090	1	77	2	0	4	4	5	0	8	0	1	5	Children and grandchildren	0	0	0	0	0	0	0	0	0	1	0	0	0	0	0	0	0	0	0	1	0	1	0	0	0	0	0	0	0	0	1	0	1	0	88
4602	101	1	77	2	0	4	5	3	0	10	0	2	5	Spouse son ande granddaughter	1	0	1	0	0	0	1	0	0	1	1	0	0	0	1	0	0	1	0	0	1	0	1	0	0	0	0	0	1	0	1	0	0	1	Heart medication
4202	001	2	77	2	1	4	4	5	0	1	0	1	5	Inlaws grandchildren and child	1	0	0	0	0	0	0	0	1	0	0	0	0	0	1	0	0	0	0	1	0	0	0	0	0	1	0	0	0	0	0	0	1	0	88
3500	032	2	77	2	1	7	13	5	0	6	0	2	4	88	0	0	1	0	0	0	0	0	0	1	0	0	1	0	1	0	0	0	0	0	0	0	0	0	0	0	0	0	1	0	1	0	0	0	88
5600	002	2	77	2	1	4	4	5	0	8	0	2	1	88	1	0	1	0	0	0	0	0	0	1	0	0	0	0	1	0	0	0	1	1	0	0	0	0	0	1	1	1	1	0	1	1	1	0	88
26400	089	2	77	2	1	4	4	3	0	5	0	2	4	88	1	0	1	0	0	0	0	0	0	0	0	0	0	0	0	0	0	0	0	1	0	0	1	0	0	1	0	0	0	0	0	0	0	0	88
15500	018	2	77	2	2	7	13	3	0	4	0	4	3	88	0	0	1	0	0	0	0	0	0	0	0	0	0	0	1	0	0	0	0	1	0	0	0	0	0	1	1	0	1	1	0	0	0	0	88
13100	123	1	77	2	2	7	13	3	0	1	0	4	2	88	0	0	1	0	0	0	0	0	0	0	0	0	0	0	0	0	0	0	0	1	0	0	0	0	0	1	0	0	0	0	0	0	0	0	88
5600	081	1	77	2	1	4	5	3	0	10	0	2	1	88	1	0	1	0	0	0	0	0	0	0	0	0	0	0	0	0	0	1	0	0	0	0	1	0	0	0	0	0	0	0	0	0	1	1	Cataract medication
2200	110	1	77	2	1	4	4	3	0	1	0	1	3	88	0	0	0	0	0	0	0	0	0	0	0	0	0	0	0	0	0	0	0	0	0	0	0	0	0	0	0	0	0	0	1	0	1	0	88
10500	165	1	77	2	9	4	10	3	0	9	0	2	2	88	1	0	0	0	0	0	0	0	0	0	0	1	0	0	0	0	0	0	1	0	0	0	1	0	0	0	0	0	0	0	1	1	0	1	Acid reflux
6000	039	2	77	2	1	1	13	5	0	9	0	2	1	88	0	0	0	0	0	0	0	0	0	0	0	0	0	0	1	0	0	0	0	1	0	1	0	0	0	1	1	0	1	1	0	0	1	0	88
20300	018	1	77	2	1	1	10	3	0	8	0	2	2	88	0	0	0	0	0	0	0	0	0	0	0	0	0	0	0	0	0	0	0	0	0	0	0	1	0	0	0	0	0	0	0	0	0	0	88
1800	024	1	77	2	1	1	16	4	0	8	0	1	4	88	0	1	0	0	0	0	0	0	0	0	0	0	0	0	1	0	0	0	0	1	0	0	0	0	0	1	0	0	1	0	0	0	1	0	88
8000	023	1	77	2	0	4	4	3	0	1	0	2	2	88	0	0	1	0	0	0	0	0	0	0	0	0	0	0	1	0	0	0	0	1	0	1	1	0	0	1	0	0	1	0	0	0	0	1	Liver condition
8000	039	1	77	2	1	1	13	3	0	1	0	2	9	88	0	0	1	0	0	0	0	0	0	0	1	0	0	0	0	0	0	0	0	0	0	0	1	0	0	0	0	0	0	0	0	0	0	1	Psychiatry
7002	066	1	77	2	1	4	5	3	0	2	0	1	2	88	0	0	0	0	0	0	0	0	0	0	0	0	0	0	1	0	0	0	0	1	0	0	0	0	0	1	1	0	1	0	0	0	1	0	88
7300	018	2	77	2	1	4	11	3	0	5	0	4	3	88	0	0	1	0	0	0	0	0	0	1	1	0	0	0	0	0	0	0	1	1	0	0	0	0	0	1	1	0	0	0	1	0	1	0	88
25900	075	1	77	2	3	7	13	1	0	7	0	2	5	Mother	1	0	0	0	0	0	0	0	0	1	0	0	0	0	0	0	0	0	0	0	0	0	0	0	0	0	0	0	0	0	0	0	1	0	88
3602	046	2	77	2	1	4	4	5	0	5	2	3	5	Children and relatives	0	0	0	0	0	0	0	0	0	1	0	0	0	0	0	0	0	0	0	0	0	0	0	0	0	0	0	0	0	0	1	0	0	0	88
20300	023	2	78	2	1	5	13	5	0	10	0	2	5	Grandson	1	0	1	0	0	0	0	0	0	0	0	0	0	0	1	0	0	0	0	1	0	0	0	0	0	1	0	0	1	0	0	0	0	0	88
20400	012	2	78	2	1	1	10	5	0	10	0	2	4	88	1	0	0	0	0	0	0	0	0	1	1	0	0	0	1	0	0	0	1	1	0	0	0	0	0	1	1	0	1	0	1	0	1	0	88
26002	076	2	78	2	1	4	1	5	0	5	0	2	4	88	1	0	0	0	0	0	0	0	0	0	0	0	0	0	0	0	0	0	0	1	0	0	0	0	0	1	0	0	0	0	0	0	0	0	88
13000	021	2	78	2	1	4	4	6	0	5	0	2	3	88	1	0	0	0	0	0	0	0	0	1	0	0	0	0	1	0	0	0	0	0	0	0	0	0	0	0	0	0	0	0	1	0	0	0	88
9304	043	2	78	2	1	1	1	5	0	10	0	2	5	Grandchild	1	0	0	0	0	0	0	0	0	0	0	0	0	0	0	0	0	0	0	1	0	0	0	0	0	0	0	0	0	0	0	0	1	0	88
8300	037	1	78	2	1	1	13	4	0	10	0	2	1	88	0	0	1	0	0	0	0	0	0	1	0	0	0	0	0	0	0	0	0	0	0	0	0	0	0	0	0	0	0	0	0	0	0	0	88
16100	096	2	78	2	1	4	4	5	9	5	0	2	4	88	1	0	0	0	0	0	0	0	1	0	0	0	0	0	0	0	0	0	0	0	0	0	0	0	1	0	0	0	0	0	0	0	0	0	88
8300	167	2	78	2	1	1	6	4	0	8	0	2	5	Granddaughter and great grandson	1	0	0	0	0	0	0	0	1	0	0	0	0	0	0	0	0	0	0	0	0	0	0	0	1	0	0	0	0	0	0	0	0	0	88
3500	023	2	78	2	9	7	10	3	0	10	0	2	3	88	1	0	1	0	0	0	0	0	0	1	0	0	0	0	1	0	0	0	1	1	0	0	0	0	0	1	0	0	1	0	1	1	0	0	88
26400	011	1	78	2	1	4	5	3	0	7	0	2	2	88	1	0	0	0	0	0	0	0	0	1	0	0	0	0	1	0	0	0	0	1	0	1	0	0	0	1	0	0	1	0	0	0	0	0	88
2400	035	2	78	2	0	4	4	5	0	5	0	2	4	88	0	0	0	0	0	0	1	0	0	1	1	0	0	0	0	0	0	0	0	0	0	0	0	0	0	0	1	0	0	0	1	0	1	0	88
18300	009	2	78	2	2	1	13	4	0	4	0	2	5	Sister brother and nephew	1	0	1	0	0	0	0	0	0	1	0	0	0	0	1	0	0	1	1	1	0	0	0	0	0	1	0	0	1	0	1	1	1	0	88
6000	056	2	78	2	0	4	4	5	0	5	0	2	4	88	1	0	0	0	0	0	0	0	0	1	0	0	0	0	1	0	0	0	0	1	0	0	0	0	0	1	0	0	1	0	0	0	1	0	88
8200	025	1	78	2	1	1	13	4	0	9	0	2	4	88	0	0	1	0	0	0	0	0	0	0	0	0	0	0	1	0	0	0	0	1	0	1	0	0	0	1	0	0	1	0	0	0	0	0	88
3200	101	2	78	2	1	4	4	5	0	1	0	2	5	Son and granddaughter	1	0	0	0	0	0	0	0	0	1	0	0	0	0	1	0	0	0	1	1	0	0	0	0	0	1	0	0	1	0	1	1	1	0	88
8000	107	1	78	2	1	4	4	3	0	3	0	2	3	88	0	1	0	0	0	0	0	0	0	0	0	1	0	0	0	0	0	0	0	0	0	1	0	0	0	0	0	0	0	0	1	0	0	1	Stroke medication
32000	083	2	78	2	1	7	1	5	0	10	0	4	4	88	0	0	0	0	0	0	0	0	0	0	0	0	0	0	0	0	0	0	0	0	0	0	0	1	0	0	0	0	0	0	0	0	0	0	88
4001	37	2	78	2	3	1	1	5	0	3	0	2	1	88	0	0	0	0	0	0	1	0	0	0	0	0	0	1	0	0	0	0	0	0	0	0	0	0	0	0	0	0	0	0	0	0	0	1	Depakote
7000	051	1	78	2	1	1	1	1	0	99	0	2	4	88	1	0	0	0	0	0	0	0	0	0	0	0	0	0	1	0	0	0	0	0	0	0	0	0	0	0	0	0	1	0	0	0	0	0	88
13000	063	2	78	2	1	4	4	5	0	5	0	1	1	88	1	0	0	0	0	0	0	0	0	1	0	0	0	0	0	0	0	0	0	0	0	0	0	0	0	0	0	0	0	0	1	0	0	0	88
8000	157	2	78	2	0	4	4	5	0	5	0	2	4	88	0	0	1	0	0	0	0	0	0	0	0	0	0	0	1	0	0	0	0	1	0	0	0	0	0	0	1	0	0	1	0	0	0	0	88
4001	31	2	79	2	1	1	13	4	0	7	0	2	5	Caregiver	0	0	0	0	0	0	0	0	0	0	0	0	0	0	1	0	0	0	0	1	0	0	0	0	0	1	1	0	1	0	0	0	0	0	88
7002	035	2	79	2	1	4	4	5	0	5	0	2	1	88	1	0	1	0	0	0	0	0	0	1	1	0	0	0	0	0	0	1	0	1	0	0	0	0	0	1	1	0	0	0	0	0	1	1	Hearing medication
1800	025	2	79	2	2	1	10	5	0	5	0	2	4	88	0	0	0	0	0	0	0	1	0	1	0	0	1	0	1	0	0	1	0	1	0	0	0	0	1	1	0	0	1	0	0	0	0	0	88
8600	113	1	79	2	1	7	13	5	0	9	0	2	4	88	0	0	1	0	0	0	0	0	0	1	0	1	0	0	0	0	0	0	0	1	0	0	0	0	0	1	0	0	0	0	1	0	0	0	88
4301	145	2	79	2	0	4	14	5	0	5	0	2	5	Grandson	0	0	1	0	0	0	0	0	0	1	0	0	0	1	1	0	1	0	1	1	0	0	0	0	0	0	1	0	1	0	1	1	0	1	Medication for head injury
6700	047	2	79	2	1	4	10	4	0	5	0	2	4	88	0	0	1	0	0	0	0	0	0	0	0	0	0	0	0	0	0	0	1	1	0	0	0	0	0	1	0	0	0	0	0	1	0	0	88
7500	023	2	79	2	1	1	2	5	0	2	0	1	4	88	1	0	0	0	0	0	0	0	0	0	0	0	0	0	0	0	0	0	0	1	0	0	1	0	0	1	0	0	0	0	0	0	0	1	High calcium
33602	065	2	79	2	0	4	4	5	9	10	0	2	4	88	1	0	0	0	0	0	0	0	1	0	0	0	0	0	0	0	0	0	0	1	0	0	1	0	0	1	0	0	0	0	1	0	0	0	88
2300	036	2	79	2	1	1	13	5	0	10	0	2	1	88	1	1	0	0	0	0	0	0	0	1	0	0	0	0	1	0	0	0	0	0	0	0	0	0	0	0	1	0	1	0	1	0	1	0	88
3500	129	2	79	2	1	5	14	5	0	10	0	2	4	88	0	0	1	0	0	0	0	0	0	1	0	0	0	0	0	0	0	0	1	0	0	0	0	0	0	0	0	0	0	0	1	1	1	0	88
15400	054	2	79	2	1	4	4	2	0	5	0	1	5	Daughter and grandson	1	0	0	0	0	0	0	0	0	0	0	0	0	0	1	0	0	0	1	1	0	1	0	0	0	1	1	1	1	0	1	1	1	0	88
33602	104	2	79	2	0	4	4	5	0	10	0	2	4	88	1	0	0	0	0	0	0	0	0	1	0	0	0	0	0	0	0	0	0	1	0	0	0	0	0	1	0	0	1	0	0	0	0	0	88
16400	022	1	79	2	1	4	4	3	0	7	0	2	2	88	1	0	0	0	0	0	0	0	0	0	0	0	0	0	1	0	0	0	0	1	0	1	0	0	0	1	0	0	1	0	1	0	0	0	88
1900	113	1	79	2	1	4	11	3	0	2	0	2	3	88	0	0	1	0	0	0	0	0	0	1	0	0	0	1	1	0	0	0	0	1	0	1	0	0	0	1	1	1	1	0	0	1	1	0	88
13700	016	2	79	2	0	4	4	5	0	1	0	2	4	88	1	0	1	0	0	0	0	0	0	1	1	0	0	0	0	0	0	1	0	1	0	0	1	0	0	1	0	0	0	0	1	0	1	1	Pancreatic illness
10900	045	2	79	2	2	7	13	3	0	5	0	2	2	88	0	0	1	0	0	0	0	0	0	0	0	0	0	0	1	0	0	0	0	1	0	0	1	0	0	1	0	0	1	0	0	0	1	0	88
25900	124	1	79	2	2	7	1	3	0	9	0	2	3	88	0	0	1	0	0	0	0	0	0	0	0	0	1	0	0	0	0	0	0	1	0	0	0	0	1	1	0	0	0	0	0	0	0	0	88
28900	71	2	79	2	1	1	10	5	0	9	0	2	4	88	0	0	1	0	0	0	0	0	0	1	0	0	0	0	0	0	0	0	0	1	0	1	1	0	0	1	0	0	0	0	1	0	0	1	Eye drops
1800	014	2	79	2	1	1	17	3	9	5	0	2	2	88	0	0	1	0	0	0	0	0	0	1	0	0	0	0	0	0	0	0	0	1	0	0	0	0	0	0	0	0	0	0	0	0	1	0	88
9001	011	1	79	2	1	1	14	5	9	10	0	2	1	88	0	0	0	0	0	0	0	0	0	0	0	0	0	0	0	0	0	0	0	0	0	0	0	0	0	0	0	0	0	0	0	0	0	0	88
9200	035	1	79	2	9	1	2	3	0	8	0	1	5	Sister	1	0	0	0	0	0	0	0	0	0	0	0	0	0	0	0	0	0	0	1	0	0	0	0	0	1	0	0	0	0	0	0	1	0	88
13700	026	1	79	2	1	4	4	3	0	8	0	1	4	88	1	0	1	0	0	0	0	0	1	1	0	0	0	0	1	0	0	1	0	0	0	0	0	0	0	1	1	1	1	1	1	1	1	0	88
9600	019	2	80	3	1	1	10	5	0	5	0	2	5	Great niece	0	0	1	0	0	0	0	0	0	0	0	1	0	0	1	0	0	0	0	0	0	0	1	0	0	0	0	0	0	1	0	0	0	1	Cancer medication
5800	013	1	80	3	3	1	10	3	1	7	4	2	2	88	0	0	0	0	0	0	0	0	1	0	0	0	0	0	0	0	0	0	0	0	0	0	0	1	1	0	0	0	0	0	0	0	0	0	88
1900	074	2	80	3	1	1	13	2	0	1	0	2	4	88	1	0	0	0	0	0	0	0	0	1	0	0	0	0	0	0	0	0	0	1	0	0	0	0	0	1	0	0	0	0	0	0	1	1	Arthritis medication
1900	023	2	80	3	2	7	13	5	0	1	0	1	5	Aunt and her daughter	0	1	0	0	0	0	0	0	0	0	0	0	0	0	0	0	0	0	0	1	0	0	0	0	0	1	0	0	0	0	0	0	1	0	88
1900	019	2	80	3	1	7	13	5	0	7	0	2	4	88	1	0	0	0	0	0	0	0	0	0	0	0	0	0	0	0	0	0	0	0	0	0	0	1	0	0	0	0	0	0	0	0	0	0	88
3601	169	2	80	3	1	4	13	5	0	5	0	1	4	88	1	0	0	0	0	0	0	0	0	1	0	0	1	0	0	0	0	0	0	1	0	1	0	0	0	1	0	0	0	0	1	0	0	1	Memory loss
6000	037	2	80	3	1	4	4	5	0	5	0	1	4	88	0	0	0	0	0	0	0	0	0	1	0	0	0	0	1	0	0	0	0	1	0	0	0	0	0	1	0	0	1	0	1	0	1	0	88
9001	079	2	80	3	1	7	13	5	0	5	0	2	4	88	1	0	0	0	0	0	0	0	0	0	0	0	0	0	1	0	0	1	0	1	0	0	0	0	0	1	0	0	1	0	0	0	0	0	88
13100	095	2	80	3	1	1	2	5	0	10	0	4	4	88	0	0	1	0	0	0	0	0	0	0	1	0	0	0	0	0	0	1	0	0	0	0	0	0	0	0	1	1	0	0	0	0	0	1	Heart and asthma medication
7000	041	1	80	3	1	1	1	4	0	99	4	4	1	88	0	0	1	0	0	0	0	0	0	0	0	0	0	0	0	0	0	0	0	0	0	0	1	0	0	0	0	0	0	0	1	0	0	1	Shortness of breath
10500	094	2	80	3	0	4	4	5	0	5	0	2	1	88	1	0	0	0	0	0	0	0	0	1	0	0	0	0	0	0	0	0	0	0	0	0	0	0	0	0	0	0	0	0	1	0	1	0	88
8000	119	1	80	3	0	5	10	3	9	1	0	2	2	88	0	0	0	0	0	0	0	0	0	0	0	0	0	0	1	0	0	0	0	0	0	0	0	0	0	0	0	0	0	1	0	0	0	0	88
15800	007	1	80	3	1	1	2	3	0	9	0	2	5	Spouse and grandchildren	0	0	0	0	0	0	0	0	0	0	0	0	0	0	0	0	0	0	0	0	0	0	0	1	0	0	0	0	0	0	0	0	0	0	88
1800	055	2	81	3	1	1	10	4	0	5	0	2	5	Sister and caregiver	0	0	0	0	0	0	0	0	0	0	0	0	0	0	0	0	0	0	0	1	0	0	0	0	0	0	0	0	0	0	0	0	1	0	88
15500	023	2	81	3	2	1	13	5	0	5	0	2	1	88	0	0	0	0	0	0	1	0	0	0	0	0	0	0	0	0	0	0	0	1	0	0	0	0	0	1	0	0	0	0	0	0	0	0	88
20300	068	2	81	3	1	1	16	5	0	8	0	2	5	Grandchildren	1	0	0	0	0	0	0	0	0	0	0	0	0	0	1	0	0	0	0	0	0	0	0	0	0	0	0	0	1	0	0	0	0	0	88
18300	101	1	81	3	1	7	13	3	0	6	0	2	3	88	0	0	1	0	0	0	0	0	0	0	0	0	0	0	1	0	0	0	0	0	0	0	0	0	0	0	0	0	1	0	0	0	1	0	88
2200	149	2	81	3	1	4	4	3	9	5	0	2	5	Spouse and son	0	0	1	0	0	0	0	0	0	1	0	0	0	0	0	0	0	0	0	0	0	0	0	0	0	0	0	0	0	0	1	0	0	0	88
1900	142	1	81	3	1	1	2	5	0	9	0	2	4	88	0	0	0	0	0	0	0	0	0	0	0	0	0	0	1	0	0	0	0	0	0	0	1	0	0	0	0	0	1	0	0	0	0	1	Prostate medication
2400	047	2	81	3	1	1	2	5	0	8	0	2	5	Children and grandchild	0	0	0	0	0	0	0	0	1	0	0	0	0	0	0	0	0	0	0	0	0	0	0	0	0	0	0	0	0	0	0	0	0	1	Sleeping pills
900	011	2	81	3	0	4	4	5	0	5	0	1	4	88	1	0	0	0	0	0	0	0	0	1	0	0	0	1	0	0	0	1	0	1	0	0	0	0	0	1	0	0	0	0	0	0	0	1	Heart medication
29104	243	2	81	3	1	1	3	2	0	10	0	1	4	88	1	0	0	0	0	0	0	0	0	1	0	0	0	0	1	0	0	0	0	1	0	0	0	0	0	1	0	0	1	1	1	0	0	0	88
1000	086	2	81	3	1	1	1	5	9	5	0	2	4	88	1	0	0	0	0	0	0	0	0	1	0	0	0	0	0	0	0	0	0	0	0	0	0	0	0	0	0	0	0	0	1	0	0	0	88
15400	003	1	81	3	4	4	11	3	0	7	0	2	2	88	0	0	0	1	0	0	0	0	0	0	0	0	0	0	0	0	0	0	0	1	0	0	0	0	0	1	0	0	0	0	0	0	0	0	88
9001	035	2	81	4	1	7	13	3	0	8	0	2	3	88	1	0	0	0	0	0	0	0	0	0	0	0	0	0	0	0	0	0	0	1	0	0	0	0	0	1	0	0	0	0	0	0	0	0	88
10900	071	2	81	3	1	7	6	5	0	5	0	2	4	88	1	0	0	0	0	0	0	0	0	1	0	0	0	0	1	0	0	1	1	1	0	0	0	0	0	1	0	1	1	1	1	1	0	0	88
13700	019	2	81	3	0	4	4	5	0	5	0	9	4	88	1	0	0	0	0	0	0	0	0	0	0	0	0	0	1	0	0	0	0	1	0	0	1	0	0	1	0	0	1	0	0	0	0	1	Giddiness
3500	111	1	81	3	2	7	2	5	0	9	0	2	1	88	1	0	1	0	0	0	0	0	0	1	0	0	0	0	0	0	0	1	0	0	0	0	1	0	0	0	0	0	0	0	0	0	0	1	Kidney medication
1900	037	1	81	3	1	1	2	5	0	9	0	2	1	88	0	0	1	0	0	0	0	0	0	0	0	0	0	0	0	0	0	0	0	0	0	0	0	1	0	0	0	0	0	0	0	0	0	1	Glaucoma medication
21200	056	1	81	3	1	4	4	5	0	10	0	1	1	88	0	0	0	0	0	0	0	0	0	0	0	0	0	0	0	0	0	0	0	0	0	0	0	1	0	0	0	0	0	0	0	0	0	0	88
3200	104	1	81	3	1	4	4	3	0	1	0	2	3	88	0	0	0	0	0	0	0	0	0	0	0	0	0	0	0	0	0	0	1	1	0	0	0	0	0	1	1	0	0	0	1	1	1	0	88
18300	009	1	81	3	1	1	13	4	0	1	0	2	5	Sisters and nephews	0	0	1	0	0	0	0	0	0	0	0	0	0	0	1	0	0	1	1	1	0	0	0	0	0	1	1	0	1	0	0	1	0	0	88
29400	125	2	81	3	4	1	14	3	0	4	0	2	2	88	1	0	0	0	0	0	0	0	0	0	0	0	0	0	0	0	0	0	0	0	0	0	0	1	0	0	0	0	0	0	0	0	1	0	88
8000	117	1	81	3	1	5	13	3	0	8	0	2	3	88	0	1	0	0	0	0	0	0	0	0	0	0	0	0	0	0	0	0	0	0	0	0	0	1	0	0	0	0	0	0	0	0	1	0	88
7500	025	2	82	3	1	7	13	5	0	5	0	1	4	88	1	0	1	0	0	0	1	0	0	1	0	0	0	0	0	0	0	0	0	1	0	0	1	0	0	1	0	0	0	0	0	0	0	1	Lungs
2200	149	1	82	3	1	4	4	3	0	9	0	2	5	Spouse and son	0	0	1	0	0	0	0	0	0	1	0	0	0	0	1	0	0	1	0	0	0	0	0	0	0	1	0	0	1	0	1	0	0	0	88
14900	134	2	82	3	1	1	1	5	0	5	0	1	5	Son and grandchildren	0	0	0	0	0	0	0	0	0	1	0	0	1	0	0	0	0	0	0	0	0	1	0	0	0	0	0	0	0	0	0	0	0	0	88
6700	060	1	82	3	1	4	13	3	0	10	0	2	3	88	0	0	1	0	0	0	0	0	0	0	0	0	0	0	0	0	0	1	0	0	0	0	0	0	0	0	0	0	0	0	1	0	0	0	88
500	083	2	82	3	2	5	13	5	9	3	0	2	4	88	0	0	0	0	0	0	0	0	1	0	0	0	0	0	0	0	0	0	0	1	0	0	0	0	0	1	1	0	0	0	0	0	1	0	88
500	083	2	82	3	2	5	13	5	0	7	0	2	1	88	1	0	0	0	0	0	0	0	0	0	0	0	0	0	0	0	0	0	0	1	0	0	0	0	0	1	0	0	0	0	0	0	0	0	88
18300	042	1	82	3	3	1	13	3	1	7	0	2	3	88	1	0	0	0	0	0	0	0	0	0	0	0	0	0	1	0	0	0	0	0	0	0	0	0	0	0	1	0	1	1	0	0	0	0	88
11000	169	2	82	3	1	4	10	3	0	5	0	1	3	88	1	0	1	0	0	0	0	0	0	0	0	0	0	1	1	0	0	0	0	0	0	0	1	0	0	0	0	0	1	0	0	0	0	1	Depression medication
7100	081	2	82	3	1	1	13	5	0	10	0	2	4	88	0	1	0	0	0	0	0	0	0	0	0	0	1	0	0	0	0	0	0	0	0	0	0	0	0	0	0	0	0	0	0	0	1	0	88
13000	051	2	82	3	1	4	4	5	0	5	0	2	5	Daughter	0	0	1	0	0	0	0	0	0	0	0	0	0	0	0	0	0	0	0	0	1	1	0	0	0	0	0	0	0	0	1	0	0	0	88
9100	066	1	82	3	1	4	4	5	0	1	0	1	4	88	0	0	0	0	0	0	0	0	0	0	0	0	0	0	0	0	0	0	0	0	0	1	0	0	0	0	0	0	0	0	0	0	0	0	88
8000	113	2	82	3	9	4	4	5	0	5	0	2	4	88	0	0	1	0	0	0	0	0	0	1	0	1	0	0	1	0	0	0	0	1	0	0	0	0	0	1	0	0	1	0	1	0	0	0	88
5100	039	1	82	3	2	1	13	4	0	3	0	2	4	88	1	0	0	0	0	0	0	0	0	0	0	0	0	0	1	0	0	0	0	1	0	0	0	0	0	1	0	0	1	0	0	0	0	0	88
8000	149	1	82	3	1	1	13	3	0	8	0	2	3	88	0	1	0	0	0	0	0	0	0	1	0	0	0	0	0	0	0	0	0	0	0	0	0	0	0	0	0	0	0	0	1	0	0	0	88
8000	120	2	82	3	0	1	13	5	0	5	0	2	4	88	0	0	0	0	0	0	0	0	0	0	0	0	0	0	0	0	0	0	0	1	0	0	0	0	0	1	0	0	0	0	0	0	0	0	88
11000	201	2	82	3	1	1	2	5	0	4	0	2	4	88	0	0	0	0	0	0	0	0	0	0	0	0	0	0	0	0	0	0	0	0	0	0	0	1	0	0	0	0	0	0	0	0	0	0	88
4402	035	2	83	3	1	7	13	5	0	5	0	2	1	88	0	0	0	0	0	0	0	0	0	1	0	0	0	0	1	0	0	0	0	1	0	0	0	0	0	1	1	1	1	0	1	0	0	0	88
700	133	1	83	3	9	1	13	3	0	2	0	2	2	88	1	0	0	0	0	0	0	0	0	0	0	0	0	0	1	0	0	0	0	1	0	0	0	0	0	1	0	0	1	0	0	0	1	0	88
4402	008	2	83	3	1	4	4	5	0	8	0	1	4	88	1	0	0	0	0	0	0	1	0	1	1	0	0	0	1	0	0	1	0	1	0	0	0	0	0	1	1	1	1	0	1	1	0	0	88
13000	090	1	83	3	1	4	4	3	0	9	0	2	2	88	0	1	0	0	0	0	0	0	0	0	0	1	0	0	1	0	0	0	0	0	0	0	0	0	0	0	0	0	1	0	1	0	0	0	88
8300	033	2	83	3	1	1	13	5	0	10	0	2	4	88	0	0	0	0	0	0	0	0	0	0	0	0	0	0	0	0	0	0	0	0	0	0	0	1	0	0	0	0	0	0	0	0	0	0	88
7300	018	1	83	3	1	4	4	3	0	10	0	4	3	88	0	0	0	0	0	0	0	0	1	1	0	0	1	0	0	0	0	0	0	1	0	0	0	0	0	1	0	0	0	0	1	0	1	0	88
3500	086	2	83	3	1	7	1	4	0	4	0	1	4	88	1	0	0	0	0	0	0	0	0	0	0	0	1	0	0	0	0	0	1	1	0	0	1	0	0	1	1	0	0	0	0	1	0	0	88
29400	054	2	83	3	1	1	7	5	0	5	0	2	1	88	1	0	0	0	0	0	0	0	0	0	0	0	0	0	1	0	0	0	0	0	0	0	0	0	0	0	0	0	1	1	0	0	0	0	88
26300	019	2	83	3	1	1	2	5	0	10	0	2	5	Children and grandchildren	1	0	0	0	0	0	0	0	0	0	0	0	0	0	1	0	0	0	0	1	0	0	0	0	0	1	0	0	1	0	0	0	0	0	88
18000	044	1	83	3	1	4	4	3	0	9	0	2	2	88	1	0	0	0	0	0	0	0	0	1	0	0	0	0	0	0	0	0	0	0	0	0	0	0	0	0	0	0	0	0	0	0	1	0	88
11000	80	1	83	3	1	1	3	3	0	9	0	2	3	88	0	0	1	0	0	0	0	0	1	0	0	1	0	0	0	0	0	0	0	0	0	0	0	0	0	0	0	0	0	0	0	0	0	1	Antibiotics
9001	035	1	83	3	1	1	13	3	0	9	0	2	3	88	0	0	0	0	0	0	0	0	0	1	1	0	1	0	0	0	0	0	0	0	0	0	0	0	1	0	0	0	0	0	0	0	0	0	88
26300	050	2	83	3	1	7	14	5	0	8	0	2	4	88	0	0	0	0	1	0	0	0	0	1	0	0	0	0	0	0	0	1	0	1	0	0	0	0	0	1	0	0	0	0	0	0	1	0	88
10500	226	2	83	3	1	1	10	5	0	2	0	2	4	88	1	0	0	0	0	0	0	0	0	1	0	0	0	0	1	0	0	0	1	1	0	0	0	0	0	1	0	0	1	0	1	1	0	0	88
7500	086	1	83	3	1	7	3	5	0	8	0	1	1	88	1	0	1	0	0	0	0	0	0	0	0	0	0	0	0	0	0	0	0	0	0	0	0	1	0	0	0	0	0	0	0	0	0	0	88
8200	011	1	83	3	1	1	13	3	0	9	0	2	2	88	0	0	1	0	0	0	0	0	0	0	0	0	0	0	1	0	0	0	0	1	0	0	0	0	0	1	0	0	0	0	0	0	1	1	Gastritis
8300	168	1	83	3	1	5	14	2	0	9	0	6	1	88	1	0	0	0	0	0	0	0	0	1	0	0	0	0	0	0	0	0	0	0	0	0	0	0	0	0	0	0	0	0	1	0	0	0	88
12400	165	1	83	3	1	7	14	1	0	2	0	2	4	88	0	0	0	0	0	0	0	0	0	0	0	0	0	0	0	0	0	0	0	0	0	0	1	0	0	0	0	0	0	0	0	0	0	1	Nerves medication
6001	100	2	84	3	1	4	4	5	0	5	0	2	3	88	0	0	0	0	0	0	0	0	0	0	0	0	0	0	1	0	0	0	0	1	0	0	0	0	0	1	0	0	1	0	0	0	0	0	88
15500	074	2	84	3	2	1	1	5	0	5	0	1	4	88	0	0	0	0	0	0	1	0	0	0	0	0	0	0	0	0	0	0	0	1	0	0	0	0	0	1	0	0	0	0	0	0	0	0	88
3400		1	84	3	1	4	4	5	0	9	0	1	5	Son and daughter in law	0	0	1	0	0	0	0	0	0	1	0	0	0	0	1	0	0	0	0	0	0	0	0	0	0	0	0	0	1	0	1	0	0	0	88
4402	027	2	84	3	1	1	6	5	0	8	0	1	4	88	1	0	0	0	0	0	0	0	1	1	0	0	0	0	0	0	0	0	0	0	0	0	0	0	0	0	0	0	0	0	0	0	0	1	Arthritis medication
20400	133	2	84	3	1	1	10	5	0	10	0	4	3	88	1	0	0	0	0	0	0	0	0	0	0	0	1	0	0	0	0	0	0	1	0	0	0	0	0	1	0	0	0	0	0	0	0	0	88
21700	091	2	84	3	1	1	13	4	0	2	0	2	5	Sister niece and nephew	1	0	0	0	0	0	0	0	0	0	0	0	0	0	1	0	0	0	1	1	0	0	0	0	0	1	0	0	1	1	0	1	0	0	88
13100	057	1	84	3	1	4	11	3	0	1	0	2	1	88	0	0	0	0	0	0	0	0	0	0	0	0	0	0	0	0	0	0	0	0	0	0	0	1	0	0	0	0	0	0	0	0	1	0	88
3500	148	1	84	3	1	7	13	4	0	9	0	2	1	88	0	0	0	0	0	0	0	0	0	0	0	0	0	0	0	0	0	0	0	0	0	0	0	1	0	0	0	0	0	0	0	0	0	0	88
19100	151	2	84	3	0	4	5	5	0	5	0	1	5	Daughter in law and son	0	0	0	0	0	0	0	0	0	1	0	0	0	0	1	0	0	1	1	0	0	0	0	0	0	1	0	0	1	0	0	1	0	1	Heart medication
19100	177	1	84	3	1	7	1	5	0	9	0	1	4	88	0	0	1	0	0	0	0	0	0	0	0	0	0	0	0	0	0	0	0	0	0	0	0	1	0	0	0	0	0	0	0	0	1	0	88
19700	070	1	84	3	0	4	4	5	0	9	0	1	5	Grandchildren and children	0	0	0	0	0	0	0	0	0	1	0	0	0	0	1	0	0	1	1	0	0	0	0	0	0	0	0	0	1	0	0	1	0	0	88
1900	075	1	84	3	1	4	10	3	0	1	0	2	3	88	0	0	0	0	0	0	0	0	0	0	0	0	0	0	0	0	0	0	0	1	0	0	0	0	0	1	0	0	0	0	0	0	0	0	88
13000	125	2	84	3	0	4	4	5	0	5	0	1	4	88	0	0	0	0	0	0	0	0	0	0	0	0	0	0	1	0	0	1	0	0	0	0	0	0	0	0	0	0	1	0	0	0	0	0	88
21200	094	1	84	3	1	1	2	3	0	7	0	2	3	88	1	0	0	0	0	0	0	0	0	0	0	0	0	0	0	0	0	0	0	0	0	0	0	1	0	0	0	0	0	0	0	0	0	0	88
25900	103	1	84	3	1	1	17	3	0	7	0	2	2	88	0	0	0	0	0	0	0	0	0	0	0	0	0	0	0	0	0	0	0	0	0	0	0	0	0	0	0	0	0	0	0	0	0	0	88
19400	046	2	84	3	2	1	10	5	0	10	0	1	4	88	0	0	0	0	0	0	1	0	0	0	0	0	0	0	0	0	0	0	0	0	0	0	0	1	0	0	0	0	0	0	0	0	0	1	Mental illness
13600	048	1	84	3	1	1	13	3	0	9	0	6	1	88	0	0	0	0	0	0	0	0	0	0	1	0	0	0	0	0	0	0	0	0	0	0	0	0	0	0	0	0	0	0	0	0	1	1	Inhaler
[truncated: 374 more columns]
